1 **EB1 binding provides a diffusion trap mechanism regulating STIM1**

2 **localization and Ca<sup>2+</sup> signaling**

3

4 **Chi-Lun Chang, Yu-Ju Chen, and Jen Liou\***

5 Department of Physiology, UT Southwestern Medical Center, Dallas, TX 75390, USA

6

7 \*Correspondence: Jen.Liou@UTSouthwestern.edu

8

9 Condensed title: EB1 binding regulates STIM1-mediated Ca<sup>2+</sup> signaling

10 **Summary**

11 STIM1 activates store-operated  $\text{Ca}^{2+}$  entry (SOCE) by translocating to endoplasmic reticulum-plasma  
12 membrane junctions. Chang et al. revealed that STIM1 localization and SOCE are regulated by a  
13 diffusion trap mechanism mediated by STIM1 binding to EB1 at growing microtubule ends.

14 **Abstract**

15 The endoplasmic reticulum (ER) Ca<sup>2+</sup> sensor STIM1 forms oligomers and translocates to ER-plasma  
16 membrane (PM) junctions to activate store-operated Ca<sup>2+</sup> entry (SOCE) following ER Ca<sup>2+</sup> depletion.  
17 STIM1 also directly interacts with end binding protein 1 (EB1) at microtubule (MT) plus-ends and  
18 resembles comet-like structures during time-lapse imaging. Nevertheless, the role of STIM1-EB1  
19 interaction in regulating SOCE remains unresolved. Using live-cell imaging combined with  
20 pharmacological perturbation and a reconstitution approach, we revealed that EB1 binding constitutes a  
21 diffusion trap mechanism restricting STIM1 targeting to ER-PM junctions. We further showed that  
22 STIM1 oligomers retain EB1 binding ability in ER Ca<sup>2+</sup>-depleted cells. EB1 binding delayed the  
23 translocation of STIM1 oligomers to ER-PM junctions and recaptured STIM1 to prevent excess SOCE  
24 and ER Ca<sup>2+</sup> overload. Thus, the counterbalance of EB1 binding and PM targeting of STIM1 shapes the  
25 kinetics and amplitude of local SOCE in regions with growing MTs, and contributes to precise  
26 spatiotemporal regulation of Ca<sup>2+</sup> signaling crucial for cellular functions and homeostasis.

## 27 **Introduction**

28  $\text{Ca}^{2+}$  is a universal second messenger that governs many important cellular functions, such as secretion,  
29 cell migration, differentiation, and apoptosis (Berridge et al., 2000; Dupont et al., 2011; Lewis, 2011).  
30 Elevation of cytosolic  $\text{Ca}^{2+}$  via inositol 1,4,5-triphosphate ( $\text{IP}_3$ )-induced  $\text{Ca}^{2+}$  release from the  
31 endoplasmic reticulum (ER) store following cell surface receptor activation is the key to  $\text{Ca}^{2+}$  signaling.  
32 Animal cells have evolved a feedback mechanism, namely store-operated  $\text{Ca}^{2+}$  entry (SOCE) that links  
33 ER  $\text{Ca}^{2+}$  store depletion to a  $\text{Ca}^{2+}$  influx across the plasma membrane (PM) from the extracellular space to  
34 support sustained  $\text{Ca}^{2+}$  signaling and ER  $\text{Ca}^{2+}$  store refill (Feske and Prakriya, 2013; Prakriya and Lewis,  
35 2015). The importance of SOCE is demonstrated by the patients with mutations in SOCE components  
36 manifesting the symptoms of immunodeficiency, autoimmunity, and skeletal myopathy (Feske, 2011).

37 SOCE is mediated by the ER  $\text{Ca}^{2+}$  sensor STIM1 and the PM  $\text{Ca}^{2+}$  channel Orai1. The activation  
38 of SOCE is a dynamic process involving changes in STIM1 subcellular localization. STIM1 is an ER  
39 transmembrane (TM) protein with an N-terminal  $\text{Ca}^{2+}$ -sensing EF hand-SAM (EF-SAM) domain in the  
40 ER lumen (Figure 1A). The cytosolic portion of STIM1 contains coiled-coil domains (CC1 to CC3), a  
41 serine/proline (S/P) region, and a C-terminal region (CT, amino acid 633-685, Figure 1A) with a  
42 polybasic motif (PB). In the resting state, STIM1 binds to  $\text{Ca}^{2+}$  in the ER lumen and localizes diffusely  
43 throughout the ER (Liou et al., 2005). Following ER  $\text{Ca}^{2+}$  store depletion,  $\text{Ca}^{2+}$ -free STIM1 rapidly  
44 oligomerizes leading to a conformational extension of the PB and the Orai1 activation domain, namely  
45 CAD, SOAR, or CC9 that roughly corresponds to the CC2-CC3 domains (Kawasaki et al., 2009; Park et  
46 al., 2009; Prakriya and Lewis, 2015; Yuan et al., 2009). The oligomerized/exposed PB binds to  
47 phosphatidylinositol 4,5-bisphosphate ( $\text{PIP}_2$ ) at the PM (Ercan et al., 2009; Liou et al., 2007; Walsh et al.,  
48 2010). STIM1- $\text{PIP}_2$  interaction traps STIM1 at ER-PM junctions where the ER and the PM form close  
49 appositions allowing STIM1 at the ER to activate Orai1 at the PM resulting in SOCE. STIM1 targeting to  
50 ER-PM junctions is a rate-limiting step in the activation of SOCE. Although STIM1 oligomerization  
51 occurs within 5 s following ER  $\text{Ca}^{2+}$  store depletion, it takes more than 40 s for STIM1 to translocate to



52 ER-PM junctions (Liou et al., 2007). The mechanism underlying the time discrepancy between STIM1  
53 oligomerization and translocation is not clear.

54 In addition to PIP<sub>2</sub> and Orai1 binding, STIM1 directly interacts with the microtubule (MT)-plus-  
55 end binding proteins EB1 and EB3 to a lesser extent (Grigoriev et al., 2008). These interactions are  
56 mediated by an EB1 binding motif that resides in the CT. STIM1 interaction with EB1 at MT plus-ends  
57 can be visualized using live-cell imaging as overexpressed STIM1 adopts MT-like organization and  
58 displays comet-like structures (Baba et al., 2006; Grigoriev et al., 2008; Honnappa et al., 2009; Mercer et  
59 al., 2006). STIM1 comets represent sub-populations of STIM1 that are transiently trapped by binding to  
60 EB1 at the contacts between MT plus-ends and the ER (Grigoriev et al., 2008). Mutation of the core EB1  
61 binding TRIP residues to TRNN disrupts STIM1-EB1 interaction, resulting in the disappearance of  
62 STIM1 comets (Honnappa et al., 2009). Nevertheless, the significance of STIM1 trapping by EB1  
63 binding in regulating STIM1 translocation to ER-PM junctions and SOCE remains unclear.

64 To dissect the contribution of EB1 binding to STIM1 localization and function, we generated  
65 iMAPPER-633, a mini-STIM1 construct that contains the ER targeting motifs and the CT (amino acid  
66 633-685), and lacks the EF-SAM, coiled-coil domains and the S/P region to mediate Ca<sup>2+</sup> sensing, Orai1  
67 binding and phosphorylation, respectively. iMAPPER-633 binds to EB1 at MT plus-ends and translocates  
68 to ER-PM junctions following chemically-induced oligomerization, indicating that it contains the  
69 necessary components to recapitulate STIM1 localization in the resting state and during ER Ca<sup>2+</sup> store  
70 depletion. Experiments using iMAPPER-633 also revealed that EB1 binding is dominant over PIP<sub>2</sub>  
71 binding within the CT and that oligomerization strongly potentiates PIP<sub>2</sub> binding, resulting in  
72 translocation. We further showed that EB1 binding restricts STIM1 diffusion in the ER and limits STIM1  
73 access to ER-PM junctions in the resting state and during ER Ca<sup>2+</sup> store depletion. Disruption of EB1  
74 binding facilitates Orai1 recruitment and SOCE activation, resulting in ER Ca<sup>2+</sup> overload. Together, our  
75 findings indicate that EB1 binding provides a diffusion trap mechanism regulating STIM1 localization  
76 and SOCE, and suggest that STIM1-mediated Ca<sup>2+</sup> signaling may be locally regulated by binding to EB1  
77 on growing MT ends.

## 78 **Results**

### 79 **iMAPPER-633: a mini-STIM1 construct that recapitulates dynamic STIM1 subcellular localization**

80 The localization of STIM1 is regulated by multiple factors including ER  $\text{Ca}^{2+}$  levels, oligomerization,  
81 phosphorylation, as well as binding to Orai1,  $\text{PIP}_2$ , and EB1. The role of EB1 binding in regulating  
82 STIM1-mediated  $\text{Ca}^{2+}$  signaling at ER-PM junctions is not well understood. To dissect the contribution of  
83 EB1 binding in STIM1 translocation to ER-PM junctions, we employed a reconstitution approach and  
84 engineered a mini-STIM1 construct that contains the signal peptide (SP) and TM of STIM1 for ER  
85 membrane localization, as well as the CT of STIM1 enabling its binding to EB1 and  $\text{PIP}_2$  (Figure 1A). A  
86 tandem FKBP (FK506 binding protein) motif (2X FKBP) was inserted into the ER luminal region  
87 following a fluorescence protein (FP) to enable oligomerization upon treatment of a small molecule  
88 AP20187, and optical imaging, respectively. (Figure 1B). We further added in the cytosolic linker region  
89 of the synthetic ER-PM junctional marker MAPPER (Chang et al., 2013), which has been shown to  
90 provide the proper length spanning the gap at ER-PM junctions. We named this mini-STIM1 construct  
91 “iMAPPER-633” (inducible MAPPER-633) because its design resembles MAPPER and features  
92 inducible translocation to ER-PM junctions via the CT of STIM1 starting at residue 633. An intermediate  
93 construct containing the SP, an FP, the 2X FKBP, and the TM displayed ER localization when expressed  
94 in HeLa cells, indicating successful ER targeting (Figure S1A). Unlike the CT in full-length STIM1  
95 which is partially buried in the resting state (Zhou et al., 2013), the CT in iMAPPER-633 is expected to  
96 be fully exposed, facilitating assessment of the contribution of EB1-binding and  $\text{PIP}_2$ -binding motifs to  
97 STIM1 localization (Figure 1B).

98         When iMAPPER-633-transfected HeLa cells were examined under confocal microscopy,  
99 iMAPPER-633 displayed comet-like structures moving toward the cell periphery, similar to resting  
100 STIM1 that binds to EB1 at MT plus-ends (upper panels in Figure 1C and Movie S1). These iMAPPER-  
101 633 comets colocalized with an ER luminal marker and with STIM1 (Figures 1C and S1B), suggesting  
102 that iMAPPER-633 is an ER protein concentrated at the contacts between MT plus-ends and the ER.

103 Consistent with the expectation that the CT of iMAPPER-633 is fully exposed and more accessible to  
104 EB1 binding than that of STIM1, iMAPPER-633 appeared to be more concentrated in MT-like structures  
105 than in the ER compared to STIM1 (Figure S1B). The extensive trapping of iMAPPER-633 at MT-like  
106 structures was accompanied by a few highly concentrated iMAPPER-633 clusters with apparent  
107 movement toward the nucleus, possibly formed due to loss of EB1 binding during MT catastrophe  
108 (Figure S1B yellow arrowheads). When AP20187 was applied to induce oligomerization, iMAPPER-633  
109 rapidly translocated into puncta while the bulk ER structure was unaffected (lower panels in Figure 1C).  
110 Colocalization of iMAPPER-633 with MAPPER, monitored by total internal reflection fluorescence  
111 (TIRF) microscopy, indicates that iMAPPER-633 puncta formation corresponds to its translocation to  
112 ER-PM junctions (Figure 1D). These results further suggest that iMAPPER-633 contains targeting motifs  
113 sufficient for recapitulating the subcellular localization of STIM1 in the resting state as well as in the  
114 oligomized state induced by ER Ca<sup>2+</sup> store depletion. These results also revealed that the exposed CT of  
115 STIM1 preferentially binds to EB1 at MT plus-ends rather than PIP<sub>2</sub> at the PM, and that oligomerization  
116 strongly potentiates PIP<sub>2</sub> binding, resulting in translocation.

### 117 **Inhibition of EB1 binding triggers iMAPPER-633 translocation to ER-PM junctions**

118 Next, we applied nocadazole (NocZ), an inhibitor of MT polymerization, to disrupt EB1-MT association.  
119 We found that iMAPPER-633 translocated to ER-PM junctions following NocZ treatment as EB1 comets  
120 disappeared (Figure 2A). Consistently, we observed that iMAPPER-633 readily localized at ER-PM  
121 junctions in cells with EB1 knockdown by small interfering RNA against EB1 (siEB1) (Figures 2B and  
122 2C). We further generated the iMAPPER-633-TRNN mutant incapable of EB1 binding and found that  
123 iMAPPER-633-TRNN pre-localized to ER-PM junctions (upper panels in Figure 2D). Notably, the  
124 intensity of iMAPPER-633-TRNN puncta remained similar following AP20187 treatment, suggesting  
125 that the majority of iMAPPER-633-TRNN was trapped at ER-PM junctions as a result of its inability of  
126 EB1 binding (lower panels in Figure 2D). These data indicate that the PB in the exposed CT is sufficient

127 for trapping iMAPPER-633 at ER-PM junctions and that EB1 binding diverts iMAPPER-633 to be  
128 trapped at MT plus-ends, preventing its localization at ER-PM junctions.

129 Unlike iMAPPER-633-TRNN, the STIM1-TRNN mutant showed a uniform distribution  
130 throughout the ER with minimal pre-localization at ER-PM junctions and no comet-like structures (Figure  
131 2E). ER  $\text{Ca}^{2+}$  store depletion by thapsigargin (TG) was required to trigger STIM1-TRNN translocation to  
132 ER-PM junctions to co-localize with iMAPPER-633-TRNN. These results are consistent with a previous  
133 finding that the CT in full-length STIM1 is partially buried and is incapable of binding to  $\text{PIP}_2$  in the PM  
134 until STIM1 activation following ER  $\text{Ca}^{2+}$  depletion (Zhou et al., 2013). We further generated a STIM1-  
135 2K construct by adding an extra PB to the very C-terminus of STIM1 to enhance its PM binding affinity.  
136 This STIM1-2K construct with two PB in tandem in the CT pre-localized to ER-PM junctions without ER  
137  $\text{Ca}^{2+}$  store depletion (Figure 2F). Similar pre-localization has been observed with the STIM1-D76A  
138 mutant that contains a point mutation disrupting its ability to bind ER  $\text{Ca}^{2+}$  and exhibits an active  
139 conformation (Liou et al., 2005). Unlike STIM1-D76A, expression of STIM1-2K did not increase basal  
140  $\text{Ca}^{2+}$  levels (Figure 2G), suggesting that STIM1-2K is not in an active conformation. These results  
141 indicate that increased PM binding affinity can cause STIM1 trapping at ER-PM junctions without  
142 activating SOCE.

### 143 **EB1 binding constitutes a diffusion trap limiting STIM1 localization at ER-PM junctions**

144 By binding to EB1 at MT plus-ends, STIM1 is transiently trapped at ER regions in contact with growing  
145 MT end. To examine the effect of EB1 binding on STIM1 diffusion, we performed fluorescence recovery  
146 after photobleaching (FRAP) experiments using cells transfected with STIM1 or STIM1-TRNN. We  
147 found that STIM1-TRNN fluorescence recovered faster than that of STIM1 in the bleached regions with a  
148 significant difference in the time required to reach the half recovery ( $t_{1/2}$ ) (Figures 3A and 3B). These  
149 results demonstrate that STIM1-EB1 interaction restricts STIM1 diffusion in the ER membrane. Trapping  
150 by EB1 at MT plus-ends likely limits the amount of STIM1 molecules accessing other ER regions  
151 including ER-PM junctions. To test this hypothesis, we monitored ER-PM junctions in cells co-

152 transfected with a mCherry-tagged ER luminal marker and YFP-tagged STIM1 using TIRF microscopy.  
153 Following NocZ treatment, an increase in the intensity ratio of STIM1 over the ER marker at ER-PM  
154 junctions was observed, whereas the intensity ratio of STIM1-TRNN over the ER marker at ER-PM  
155 junctions remained the same (Figures 3C, 3D and 3E). These findings indicate that NocZ treatment  
156 released the sub-population of STIM1 trapped by EB1 at MT plus-ends, resulting in an increase of STIM1  
157 molecules diffusing through ER-PM junctions in resting cells.

### 158 **Activated STIM1 retains EB1 binding ability in ER Ca<sup>2+</sup>-depleted cells**

159 A previous report suggested that STIM1 oligomerization following ER Ca<sup>2+</sup> store depletion does not  
160 preclude its association with endogenous EB proteins (Grigoriev et al., 2008). In support of this idea, we  
161 observed partial co-localization of STIM1 and EB1 after TG treatment (Figure 4A). Consistently,  
162 immunoprecipitation (IP) experiments showed that a portion of mCherry-STIM1 remained bound to EB1-  
163 GFP following TG treatment while mCherry-STIM1-TRNN showed negligible interaction with EB1-GFP  
164 (Figures 4B and S2A). We further applied 100  $\mu$ M ML-9, which has been shown to rapidly trigger  
165 STIM1 dissociation from ER-PM junctions and reversion of puncta formation (Smyth et al., 2008), to  
166 cells co-transfected with STIM1 and EB1 during ER Ca<sup>2+</sup> store depletion. Following ML-9 treatment,  
167 TG-induced STIM1 puncta rapidly disappeared and STIM1-trapping by EB1 became apparent without  
168 refilling the ER Ca<sup>2+</sup> store (Figure 4C). The disappearance of STIM1 puncta induced by ML-9 treatment  
169 was not due to the disruption of ER-PM junctions as monitored by an ER luminal marker using TIRF  
170 microscopy (Figure 4D). It is possible that ML-9 abolishes STIM1 trapping by PM PIP<sub>2</sub> since STIM1  
171 trapping at ER-PM junctions by Orai1 was not affected by ML-9 treatment (Figure S2B). Furthermore,  
172 we found that STIM1-D76A, a constitutively active mutant that pre-localizes at ER-PM junctions without  
173 ER Ca<sup>2+</sup> store depletion, was immediately trapped by EB1 following ML-9 treatment (Figure 4E; Movie  
174 S2), whereas STIM1-D76A-TRNN displayed ER localization after ML-9-induced dissociation from ER-  
175 PM junctions (Figure 4F). Together, these results demonstrate that STIM1 can bind to EB1 at MT plus-

176 ends regardless of its activation state and the level of ER Ca<sup>2+</sup> store. These findings indicate that EB1 at  
177 MT plus-ends can still capture and trap STIM1 during ER Ca<sup>2+</sup> depletion.

178 **EB1 binding impedes STIM1 translocation to ER-PM junctions and Orai1 recruitment during ER**  
179 **Ca<sup>2+</sup> depletion**

180 We then reasoned that the diffusion trap mechanism mediated by EB1 binding may impede STIM1  
181 translocation to ER-PM junctions following ER Ca<sup>2+</sup> store depletion. Consistent with this notion, we  
182 observed nearly complete translocation of YFP-STIM1-TRNN 30 s after 1 μM ionomycin treatment  
183 while YFP-STIM1 only began to accumulate at ER-PM junctions (Figure 5A). The *t*<sub>1/2</sub> of STIM1  
184 translocation to ER-PM junctions was 56.2 s (Figure 5B), which is comparable to a previous report (Liou  
185 et al., 2007). By contrast, STIM1-TRNN showed a significantly faster translocation than STIM1 with a  
186 *t*<sub>1/2</sub> of 22.5 s. A higher amplitude of STIM1-TRNN translocation to ER-PM junctions than that of STIM1  
187 was observed, indicating enhanced accumulation of STIM1-TRNN compared to STIM1 at ER-PM  
188 junctions (Figure 5B). The kinetic differences in translocation to ER-PM junctions between STIM1 and  
189 STIM1-TRNN were also detected in cells treated with TG (Figures S3A and S3B). Consistently, a  
190 significant increase in the rate of STIM1 translocation following ionomycin treatment was detected in  
191 siEB1-treated cells compared with those treated with siControl (Figures S3C and S3D). Notably,  
192 disruption of STIM1-EB1 interaction consistently led to an accelerated STIM1 translocation by 23-34 s  
193 regardless of the rate of ER Ca<sup>2+</sup> store depletion. These results indicate that trapping by EB1 at MT plus-  
194 ends delays diffusion of STIM1 oligomers to ER-PM junctions during ER Ca<sup>2+</sup> store depletion.

195 Activated STIM1 trapped at ER-PM junctions can bind to the PM Ca<sup>2+</sup> channel Orai1, resulting  
196 in Orai1 recruitment to ER-PM junctions. We further monitored Orai1-mCherry translocation to ER-PM  
197 junctions in cells co-expressing YFP-STIM1 or YFP-STIM1-TRNN. Following TG treatment,  
198 translocation of STIM1 and STIM1-TRNN preceded Orai1 recruitment to ER-PM junctions with a  
199 difference in *t*<sub>1/2</sub> of 15 s (103.1 s for STIM1 and 118.8 s for Orai1) and 10 s (78.9 s for STIM1-TRNN and  
200 88.9 s for Orai1), respectively (Figures 5C and 5D). Notably, a significant acceleration of Orai1

201 accumulation at ER-PM junctions by 30 s (88.9 s vs. 118.8 s) was observed in STIM1-TRNN  
202 overexpressing cells compared with STIM1-overexpressing one (Figure 5D). These data indicate that  
203 STIM1-trapping by EB1 at MT plus-ends delays the binding and recruitment of Orai1 by STIM1 at ER-  
204 PM junctions during ER Ca<sup>2+</sup> store depletion.

### 205 **Disruption of EB1 binding facilitated SOCE and resulted in ER Ca<sup>2+</sup> store overload**

206 STIM1 interaction with Orai1 at ER-PM junctions initiates SOCE. Thus, regulation of STIM1  
207 localization by EB1 binding in the resting state and during ER Ca<sup>2+</sup> store depletion likely shapes the  
208 dynamics and extent of SOCE. Consistent with this notion, the sustained phase of cytosolic Ca<sup>2+</sup> levels  
209 following ER Ca<sup>2+</sup> depletion induced by histamine and TG treatment in siEB1-treated cells was higher  
210 than that in siControl-transfected cells, suggesting an enhanced SOCE (Figure 6A). Next, we selectively  
211 monitored Ca<sup>2+</sup> entry from the extracellular space following ER Ca<sup>2+</sup> store depletion as a specific readout  
212 for SOCE and found that knockdown of EB1 resulted in a significant increase in the amplitude of SOCE  
213 (Figure 6B). Consistently, STIM1-TRNN overexpression also led to a significant enhancement of SOCE  
214 than that mediated by STIM1 overexpression (Figure 6C). The effect of EB1-mediated STIM1 diffusion  
215 trap on Ca<sup>2+</sup> signaling was further exemplified in experiments using the constitutively active STIM1-  
216 D76A and STIM1-D76A-TRNN constructs. Overexpression of STIM1-D76A led to a marked increase in  
217 basal cytosolic Ca<sup>2+</sup> levels compared to control (STIM1-D76A vs. TM, Figure 6D). This increase is due  
218 to a constitutive SOCE because removal of extracellular Ca<sup>2+</sup> rapidly decreased the cytosolic Ca<sup>2+</sup> to the  
219 control level and re-addition of extracellular Ca<sup>2+</sup> rapidly restored the elevated cytosolic Ca<sup>2+</sup> level in  
220 STIM1-D76A overexpressing cells. Overexpression of STIM1-D76A-TRNN further potentiates the  
221 elevated cytosolic Ca<sup>2+</sup> level at basal and following re-addition of extracellular Ca<sup>2+</sup> (Figure 6D).  
222 Together, these results indicate that EB1 binding limits STIM1 localization at ER-PM junctions,  
223 dampening the amplitudes of STIM1-mediated SOCE.

224 A main function of SOCE is to refill the ER Ca<sup>2+</sup> store following depletion. We further tested if  
225 enhanced SOCE caused by the absence of STIM1-EB1 interaction results in ER Ca<sup>2+</sup> store overload. In

226 the resting cells, we observed a significantly elevated ER Ca<sup>2+</sup> store in siEB1-treated cells as monitored  
227 by the release of ER Ca<sup>2+</sup> by ionomycin treatment in the absence of extracellular Ca<sup>2+</sup> (Figure 6E). We  
228 further tracked the dynamic changes in ER Ca<sup>2+</sup> levels during store depletion and refill using an ER Ca<sup>2+</sup>  
229 sensor D1ER (Palmer et al., 2004) and a reversible SERCA inhibitor named BHQ. We found that the  
230 level of ER Ca<sup>2+</sup> was moderately elevated in STIM1-TRNN-transfected cells compared with that in  
231 STIM1-transfected cells before and after depletion by BHQ (Figure 6F, phases I and II). Following BHQ  
232 washout and re-addition of extracellular Ca<sup>2+</sup>, a significant elevation in the ER Ca<sup>2+</sup> level was observed in  
233 STIM1-TRNN-overexpressing cells compared with that in STIM1-overexpressing cells (Figure 6F, phase  
234 III and IV). Notably, the ER Ca<sup>2+</sup> level after refill was comparable to that before BHQ-induced depletion  
235 in STIM1-overexpressing cells (Figure 6G); however, the level of ER Ca<sup>2+</sup> after refill was significantly  
236 higher than that before depletion in STIM1-TRNN-overexpressing cells. These results indicate that EB1  
237 binding constitutes a mechanism that optimizes SOCE and prevents ER Ca<sup>2+</sup> store overload.



## 238 Discussion

239 Based on our findings, we propose a model in which EB1-mediated diffusion trapping of STIM1  
240 optimizes SOCE at ER-PM junctions and prevents ER Ca<sup>2+</sup> overload (Figure 7). In the resting state, EB1  
241 binding traps STIM1 at growing MT ends, restricting the amount of freely diffusible STIM1 in the ER  
242 membrane. Following ER Ca<sup>2+</sup> store depletion, EB1 binding continues to serve as a counterbalance  
243 mechanism, limiting STIM1 localization at ER-PM junctions and activation of SOCE. In subcellular  
244 regions without growing MT, freely diffusible STIM1 molecules in the ER can readily bind to PM PIP<sub>2</sub> to  
245 mediate SOCE at ER-PM junctions following ER Ca<sup>2+</sup> store depletion. Without the counterforce provided  
246 by EB1 binding, STIM1 stays longer at ER-PM junctions, resulting in elevated SOCE and ER Ca<sup>2+</sup> store  
247 overload.

248 This model can be further applied to understand physiological functions in cells with polarized  
249 MT distribution. During directed cell migration, MT plus-ends are orientated towards the front end of  
250 cells (Rodriguez et al., 2003). STIM1-EB1 interaction leads to polarized STIM1 distribution accompanied  
251 by low cytosolic and ER Ca<sup>2+</sup> levels, indicative of limited SOCE, at the front end of migrating cells (Tsai  
252 et al., 2014). Additionally, disrupting the polarized distribution by introducing STIM1-TRNN abolished  
253 cell migration, demonstrating the importance of STIM1-EB1 interaction in STIM1 distribution and in  
254 maintaining polarized Ca<sup>2+</sup> signaling for cell migration.

255 STIM1 translocation to ER-PM junctions is a complex process involving in a series of signaling  
256 events with multiple mechanisms contributing to STIM1 targeting to ER-PM junctions, such as STIM1-  
257 PIP<sub>2</sub> binding and STIM1-Orai1 interaction (Prakriya and Lewis, 2015). Moreover, several STIM1/Orai1-  
258 interacting proteins, including SARAF (Palty et al., 2012), septins (Sharma et al., 2013), junctate  
259 (Srikanth et al., 2012), and CRACR2A (Srikanth et al., 2010), have been shown to regulate STIM1  
260 translocation, STIM1-Orai1 interaction, or SOCE. These factors likely obscured previous studies in  
261 understanding of how STIM1-EB1 interaction contributes to SOCE and caused contradictory results  
262 (Baba et al., 2006; Bakowski et al., 2001; Ribeiro et al., 1997; Smyth et al., 2007). By generating

263 iMAPPER-633, a mini-STIM1 construct that contains the ER targeting motifs, an FP, a chemically-  
264 inducible oligomerization unit, cytosolic linkers, and the CT of STIM1, the subcellular localization of  
265 STIM1 in the resting state and during ER Ca<sup>2+</sup> depletion was successfully recapitulated. This  
266 reconstitution approach revealed that the EB1 trapping mechanism is dominant over PM targeting via the  
267 PB even in the exposed CT. We further found that the PB in the exposed CT is sufficient for PM targeting  
268 since disrupting STIM1-EB1 interaction led to a clear shift of iMAPPER-633 localization to ER-PM  
269 junctions without oligomerization. Oligomerization likely creates a stronger polybasic motif for PIP<sub>2</sub>  
270 binding, enabling a shift of iMAPPER-633 trapping at MT plus-ends to ER-PM junctions. Thus, it is  
271 likely that STIM1 activation not only exposes the PB but also generates a stronger PB by oligomerization  
272 that counterbalances the EB1-mediated trapping mechanism, leading to translocation to ER-PM junctions.  
273 Consistent with this notion, STIM1-2K with an enhanced PB shifts the balance toward PM binding and  
274 distributes to ER-PM junctions prior to STIM1 activation.

275         We demonstrated that EB1 binding significantly reduces STIM1 diffusion in the bulk of the ER.  
276 This observation may explain the slow diffusion coefficient of STIM1 (~0.1 μm<sup>2</sup>/s) in the resting state  
277 (Liou et al., 2007; Wu et al., 2014); whereas ER membrane proteins in general have a diffusion  
278 coefficient of 0.2-0.5 μm<sup>2</sup>/s (Lippincott-Schwartz et al., 2000). Interestingly, single molecule tracking of  
279 STIM1 revealed a broad range of diffusion coefficients (Wu et al., 2014), which may represent a mixed  
280 population of EB1-free and EB1-trapped STIM1. Consistent with a previous study, we found that  
281 ionomycin-induced STIM1 translocation to ER-PM junctions is a much slower process with a  $t_{1/2}$  ~50 s  
282 compared to STIM1 oligomerization that occurs almost instantly during ER Ca<sup>2+</sup> depletion (Liou et al.,  
283 2007). STIM1-TRNN showed a significantly faster translocation with ~2-fold increase in  $t_{1/2}$ . The  
284 enhanced STIM1-TRNN translocation to ER-PM junctions further led to an accelerated Orail  
285 accumulation at ER-PM junctions, indicating that EB1 binding regulates the kinetics of SOCE.

286         Moreover, we demonstrated that the trapping mechanism mediated by EB1 works continuously  
287 during SOCE since activated STIM1 was recaptured by EB1 following the disruption of PM trapping by  
288 ML-9, a potent inhibitor of myosin light chain kinase (MLCK). The effects of ML-9 on STIM1 appeared

289 to be independent of MLCK inhibition since knockdown of MLCK had no effect on SOCE (Smyth et al.,  
290 2008). Consistent with a previous observation that ML-9 was ineffective in inhibiting SOCE when both  
291 STIM1 and Orai1 were overexpressed, we found STIM1-Orai1 clusters remained similar following ML-9  
292 treatment (Figure S2B). Thus, it is possible that ML-9 affects STIM1 interaction with PIP<sub>2</sub> at the PM.  
293 There are multiple proteins localize at ER-PM junctions by binding to PM lipids to provide inter-  
294 organelle signaling (Chang and Liou, 2016; Henne et al., 2015). Further work in defining the mechanisms  
295 underlying the actions of ML-9 may shed new light on STIM1 targeting and the function and regulation  
296 of ER-PM junctions.

297 A previous study demonstrated that STIM1 phosphorylation at residue S575, S608, and S621 by  
298 ERK1/2 is important for STIM1 dissociation from EB1 and translocation to ER-PM junctions during ER  
299 Ca<sup>2+</sup> store depletion (Pozo-Guisado et al., 2013). Intriguingly, STIM1 phosphorylation was detected 2-5  
300 min after TG treatment, arguing that STIM1 phosphorylation may occur after its translocation to ER-PM  
301 junctions. Nonetheless, STIM1 phosphorylation may provide a mechanism to disengage EB1 trapping for  
302 enhancing SOCE under certain conditions, such as cell migration (Casas-Rua et al., 2015).  
303 Phosphorylation of STIM1 may also be relevant during cell division since dissociation of phosphorylated  
304 STIM1 from EB1 is required for exclusion of the ER from mitotic spindles (Smyth et al., 2012).

305 SOCE is one of the most important pathways for Ca<sup>2+</sup> signaling and homeostasis. Thus, the  
306 precise spatial-temporal regulation of SOCE is crucial for supporting cellular functions and health. Here  
307 we reveal an unexpected role of MT plus-ends in optimizing STIM1 translocation and SOCE via the EB1-  
308 mediated trapping mechanism and show that STIM1-EB1 interaction is important for preventing Ca<sup>2+</sup>  
309 overload, which has been associated with many pathological conditions including stroke,  
310 neurodegeneration and cancer (Dong et al., 2006; Orrenius et al., 2003; Trump and Berezsky, 1995). Our  
311 study on the crosstalk between MT plus-ends and STIM1-mediated SOCE may shed light on how cells  
312 dynamically coordinate MT growth to regulate Ca<sup>2+</sup> signaling in physiological processes.

## 313 **Materials and methods**

### 314 **Reagents**

315 Thapsigargin (TG), Pluronic F-127, and Fura-2 AM were purchased from Invitrogen (Carlsbad, CA). All  
316 chemicals for extracellular buffer (ECB, 125 mM NaCl, 5 mM KCl, 1.5 mM MgCl<sub>2</sub>, 20 mM HEPES, 10  
317 mM glucose, and 1.5 mM CaCl<sub>2</sub>, pH 7.4), penicillin and streptomycin solution, ML-9, nocodazole  
318 (NocZ), ionomycin, histamine, and EGTA were obtained from Sigma (St. Louis, MO). AP20187 was  
319 purchased from Clontech (Mountain View, CA). BHQ was obtained from Calbiochem (Billerica, MA).  
320 Anti-EB1 antibody (ab53358) and anti-beta actin antibody (ab8227) were obtained from Abcam  
321 (Cambridge, MA). Human cDNA library and small interfering RNA (siRNA) used in this study were  
322 generated as described previously (Liou et al., 2005). Primers used for siRNA generation are listed in  
323 Table S1.

### 324 **Cell Culture and Transfection**

325 HeLa cells purchased from ATCC (Manassas, VA) were cultured in MEM supplemented with 10% FBS  
326 (HyClone, Logan, UT) and penicillin and streptomycin solution. DNA plasmids (25-50 ng) and siRNAs  
327 (25 nM) were transfected into HeLa cells with TransIT-LT1 reagent for 16-20 hours and TransIT-TKO  
328 reagent for 48-72 hours, respectively (Muris Bio, Madison, WI).

### 329 **DNA Constructs**

330 YFP-STIM1, YFP-STIM1-D76A, MAPPER, mCherry-STIM1, mCherry-ER (KDEL), Orai1-mCherry,  
331 mCherry-TM and mCherry-K Ras tail were described previously (Chang et al., 2013; Liou et al., 2007;  
332 Liou et al., 2005). mCherry-STIM1-D76A was constructed by replacing the YFP portion of YFP-STIM1-  
333 D76A with mCherry. iMAPPER-633 was generated by inserting PCR fragments of (i) 2X FKBP, (ii) TM  
334 plus cytosolic regions of MAPPER (without PM targeting motif), and (iii) STIM1 CT containing amino  
335 acid 633 to 685, into the MAPPER (YFP or mCherry) construct digested with SpeI and BamHI. CT  
336 mutants of STIM1 and iMAPPER-633 were generated using QuickChange site-direct mutagenesis kit

337 (Agilent Technologies, Santa Clara, CA). STIM1-2K was generated by site-directed mutagenesis to insert  
338 a fragment encoding glycine, alanine, glycine and amino acids 671 to 685 before the stop codon of  
339 STIM1. EB1-GFP and EB1-mCherry were cloned by inserting a PCR fragment containing EB1 into GFP-  
340 N1 and mCherry-N1 plasmids, respectively. All constructs listed here were verified by sequencing. All  
341 oligonucleotides used in this study are listed in Table S1.

### 342 **Immunoprecipitation**

343 HeLa cells were cultured on 6-well plates and transfected with EB1-GFP (300 ng/well) and mCherry-  
344 STIM1 subtypes (200 ng/well) for overnight. Cells were then washed with warm PBS before lysis with 20  
345 mM Tris buffer, pH 7.5 containing 100 mM NaCl, 0.5% NP-40, and protease inhibitors on ice for 30 min.  
346 The lysates were subjected to centrifugation at 16,000 X g for 15 min at 4°C and the clear lysates  
347 (supernatants) were collected. The lysates were mixed with GFP-nAb agarose resin (Allele  
348 Biotechnology, San Diego, CA) and incubated with tumbling for 2 h at 4°C. The immunoprecipitated  
349 proteins were eluted with NuPAGE LDS sample buffer (Life Technologies, Carlsbad, CA) after washing  
350 the GFP-nAb agarose resin with 10 mM Tris buffer containing 150 mM NaCl and 0.5% NP-40 for four  
351 times. The eluted proteins were analyzed by Western blotting using antibodies against GFP (Abcam,  
352 ab290) or STIM1 (Cell Signaling Technology, #4916).

### 353 **Live-Cell Confocal and TIRF Microscopy and Image Analysis**

354 HeLa cells were cultured and transfected on Lab-Tek chambered #1 coverglass (NUNC, Rochester, NY).  
355 Before imaging, cells were washed with ECB. Live-cell confocal and TIRF imaging experiments were  
356 performed at room temperature with a CFI Apo 60 X or 100 X objectives (NA 1.49) and a confocal-TIRF  
357 microscope custom-built using a Nikon Eclipse Ti microscope (Melville, NY) with an HQ2 camera and  
358 an EM camera (c9100-13; Hamamatsu). The microscope was controlled by Micro-Manager software  
359 (Edelstein et al., 2010). Fluorescence recovery after photobleaching (FRAP) experiment was performed  
360 with a 60 X objective and Andor spinning disk confocal and FRAPPA units on a Nikon Eclipse Ti  
361 microscope controlled by MetaMorph software (Molecular Devices, Sunnyvale, CA). A 4.65  $\mu\text{m}^2$  area of

362 HeLa cells expressing YFP-STIM1 or YFP-STIM1-TRNN were subjected to photobleaching with 3  
363 pulses of 515 nm laser for 300  $\mu$ s at maximal intensity. The intensity traces of the photobleached areas  
364 were analyzed and normalized to a non-bleached area in the same cells. For the analyses of STIM1  
365 subtypes and Orail translocation to ER-PM junctions, 20 to 30 puncta in each cell from TIRF images  
366 were selected. The intensity traces of the selected puncta from the same cell were background subtracted,  
367 normalized to time zero, and averaged.

### 368 **Cytosolic and ER Ca<sup>2+</sup> Levels Measurement**

369 For measuring cytosolic Ca<sup>2+</sup> levels, HeLa cells were loaded with 0.5  $\mu$ M fura-2 AM in ECB containing  
370 0.05% pluronic F-127 and 0.1% of BSA for 30 minutes at room temperature avoiding light. Loaded cells  
371 were then washed with ECB containing 0.1% BSA, and incubated in ECB for another 15-30 minutes  
372 before the experiments. Single-cell Ca<sup>2+</sup> images were taken with a Plan Fluor 4X objective (NA 0.15) and  
373 an automated microscope custom-built on a Nikon Eclipse Ti microscope with a camera (HQ2;  
374 Photometrics). The microscope was controlled by Micro-Manager software (Edelstein et al., 2010).  
375 Intracellular Ca<sup>2+</sup> levels were indicated by ratio of emission 510 nm excited at 340 nm over those at 380  
376 nm. To measure ER Ca<sup>2+</sup> levels, HeLa cells were co-transfected with D1ER and mCherry-STIM1 or  
377 mCherry-STIM1-TRNN. Single-cell Ca<sup>2+</sup> images were taken with a Plan Fluor 40X objective (NA 1.30)  
378 and a confocal-TIRF microscope custom-built using a Nikon Eclipse Ti microscope with an HQ2 camera  
379 and an EM camera (c9100-13; Hamamatsu). Dynamic changes in ER Ca<sup>2+</sup> levels were indicated by the  
380 ratio of FRET (CFP excitation-YFP emission) signal to that of CFP.

### 381 **Statistical Analysis**

382 Data were statistically analyzed by t-test or one-way analysis of variance (ANOVA) using SigmaPlot  
383 software (Systat Software Inc., San Jose, CA).

384 **Acknowledgements**

385 We thank Carlo Quintanilla for carefully reading the manuscript and the Liou laboratory members for  
386 valuable discussions and technical assistance. We also thank the University of Texas Southwestern Live-  
387 Cell Imaging Facility for assistance with FRAP experiments. We are grateful to Linda Patterson for  
388 administrative assistance. This work was supported by National Institutes of Health grant GM113079,  
389 Welch Foundation Grant I-1789, Howard Hughes Medical Institute Graduate Grant 56006776 (to the  
390 Mechanisms of Disease and Translational Science Ph.D. Track), Taiwan National Science Council Grant  
391 102-2917-I-564-019. J. Liou is a Sowell Family Scholar in Medical Research. The authors declare no  
392 competing financial interests.

393 **Author Contributions**

394 C.-L.C. and J.L. designed iMAPPER-633. C.-L.C., Y.-J. C., and J.L. performed experiments. C.-L.C. and  
395 J.L. analyzed the results. J.L. conceived and supervised the project. C.-L.C. and J.L. wrote the  
396 manuscript.



397 **Abbreviations**

398 CT, C-terminal region;

399 EB1, end binding protein 1;

400 ECB, extracellular buffer;

401 EF-SAM, EF hand-sterile  $\alpha$  motif;

402 ER, endoplasmic reticulum;

403 FKBP, FK506-binding protein;

404 iMAPPER, inducible MAPPER;

405 IP<sub>3</sub>, inositol 1,4,5-triphosphate;

406 MAPPER, membrane-attached peripheral ER;

407 MT, microtubule;

408 NocZ, nocodazole;

409 PB, polybasic motif;

410 PM, plasma membrane;

411 PIP<sub>2</sub>, phosphatidylinositol 4,5-bisphosphate;

412 SERCA, sarco/endoplasmic reticulum Ca<sup>2+</sup>-ATPase

413 SOCE, store-operated Ca<sup>2+</sup> entry;

414 STIM1, stromal interaction molecule 1;

415 TG, thapsigargin;

416 TIRF, total internal reflection fluorescence

417 **References**

- 418 Baba, Y., K. Hayashi, Y. Fujii, A. Mizushima, H. Watarai, M. Wakamori, T. Numaga, Y. Mori, M. Iino,  
419 M. Hikida, and T. Kurosaki. 2006. Coupling of STIM1 to store-operated Ca<sup>2+</sup> entry through its  
420 constitutive and inducible movement in the endoplasmic reticulum. *Proc Natl Acad Sci U S A*.  
421 103:16704-16709.
- 422 Bakowski, D., M.D. Glitsch, and A.B. Parekh. 2001. An examination of the secretion-like coupling model  
423 for the activation of the Ca<sup>2+</sup> release-activated Ca<sup>2+</sup> current I(CRAC) in RBL-1 cells. *J Physiol*.  
424 532:55-71.
- 425 Berridge, M.J., P. Lipp, and M.D. Bootman. 2000. The versatility and universality of calcium signalling.  
426 *Nat Rev Mol Cell Biol*. 1:11-21.
- 427 Casas-Rua, V., P. Tomas-Martin, A.M. Lopez-Guerrero, I.S. Alvarez, E. Pozo-Guisado, and F.J. Martin-  
428 Romero. 2015. STIM1 phosphorylation triggered by epidermal growth factor mediates cell  
429 migration. *Biochimica et biophysica acta*. 1853:233-243.
- 430 Chang, C.L., T.S. Hsieh, T.T. Yang, K.G. Rothberg, D.B. Azizoglu, E. Volk, J.C. Liao, and J. Liou. 2013.  
431 Feedback regulation of receptor-induced Ca<sup>2+</sup> signaling mediated by E-Syt1 and Nir2 at  
432 endoplasmic reticulum-plasma membrane junctions. *Cell reports*. 5:813-825.
- 433 Chang, C.L., and J. Liou. 2016. Homeostatic regulation of the PI(4,5)P<sub>2</sub>-Ca(2+) signaling system at ER-  
434 PM junctions. *Biochim Biophys Acta*. 1861:862-873.
- 435 Dong, Z., P. Saikumar, J.M. Weinberg, and M.A. Venkatachalam. 2006. Calcium in cell injury and death.  
436 *Annual review of pathology*. 1:405-434.
- 437 Dupont, G., L. Combettes, G.S. Bird, and J.W. Putney. 2011. Calcium oscillations. *Cold Spring Harb*  
438 *Perspect Biol*. 3.
- 439 Edelstein, A., N. Amodaj, K. Hoover, R. Vale, and N. Stuurman. 2010. Computer control of microscopes  
440 using microManager. *Curr Protoc Mol Biol*. Chapter 14:Unit14 20.

- 441 Ercan, E., F. Momburg, U. Engel, K. Temmerman, W. Nickel, and M. Seedorf. 2009. A conserved, lipid-  
442 mediated sorting mechanism of yeast Ist2 and mammalian STIM proteins to the peripheral ER.  
443 *Traffic*. 10:1802-1818.
- 444 Feske, S. 2011. Immunodeficiency due to defects in store-operated calcium entry. *Ann N Y Acad Sci*.  
445 1238:74-90.
- 446 Feske, S., and M. Prakriya. 2013. Conformational dynamics of STIM1 activation. *Nat Struct Mol Biol*.  
447 20:918-919.
- 448 Grigoriev, I., S.M. Gouveia, B. van der Vaart, J. Demmers, J.T. Smyth, S. Honnappa, D. Splinter, M.O.  
449 Steinmetz, J.W. Putney, Jr., C.C. Hoogenraad, and A. Akhmanova. 2008. STIM1 is a MT-plus-  
450 end-tracking protein involved in remodeling of the ER. *Curr Biol*. 18:177-182.
- 451 Henne, W.M., J. Liou, and S.D. Emr. 2015. Molecular mechanisms of inter-organelle ER-PM contact  
452 sites. *Curr Opin Cell Biol*. 35:123-130.
- 453 Honnappa, S., S.M. Gouveia, A. Weisbrich, F.F. Damberger, N.S. Bhavesh, H. Jawhari, I. Grigoriev, F.J.  
454 van Rijssel, R.M. Buey, A. Lawera, I. Jelesarov, F.K. Winkler, K. Wuthrich, A. Akhmanova, and  
455 M.O. Steinmetz. 2009. An EB1-binding motif acts as a microtubule tip localization signal. *Cell*.  
456 138:366-376.
- 457 Kawasaki, T., I. Lange, and S. Feske. 2009. A minimal regulatory domain in the C terminus of STIM1  
458 binds to and activates ORAI1 CRAC channels. *Biochem Biophys Res Commun*. 385:49-54.
- 459 Lewis, R.S. 2011. Store-operated calcium channels: new perspectives on mechanism and function. *Cold*  
460 *Spring Harb Perspect Biol*. 3.
- 461 Liou, J., M. Fivaz, T. Inoue, and T. Meyer. 2007. Live-cell imaging reveals sequential oligomerization  
462 and local plasma membrane targeting of stromal interaction molecule 1 after Ca<sup>2+</sup> store  
463 depletion. *Proc Natl Acad Sci U S A*. 104:9301-9306.
- 464 Liou, J., M.L. Kim, W.D. Heo, J.T. Jones, J.W. Myers, J.E. Ferrell, Jr., and T. Meyer. 2005. STIM is a  
465 Ca<sup>2+</sup> sensor essential for Ca<sup>2+</sup>-store-depletion-triggered Ca<sup>2+</sup> influx. *Curr Biol*. 15:1235-1241.

- 466 Lippincott-Schwartz, J., T.H. Roberts, and K. Hirschberg. 2000. Secretory protein trafficking and  
467 organelle dynamics in living cells. *Annu Rev Cell Dev Biol.* 16:557-589.
- 468 Mercer, J.C., W.I. Dehaven, J.T. Smyth, B. Wedel, R.R. Boyles, G.S. Bird, and J.W. Putney, Jr. 2006.  
469 Large store-operated calcium selective currents due to co-expression of Orai1 or Orai2 with the  
470 intracellular calcium sensor, Stim1. *J Biol Chem.* 281:24979-24990.
- 471 Orrenius, S., B. Zhivotovsky, and P. Nicotera. 2003. Regulation of cell death: the calcium-apoptosis link.  
472 *Nat Rev Mol Cell Biol.* 4:552-565.
- 473 Palmer, A.E., C. Jin, J.C. Reed, and R.Y. Tsien. 2004. Bcl-2-mediated alterations in endoplasmic  
474 reticulum Ca<sup>2+</sup> analyzed with an improved genetically encoded fluorescent sensor. *Proc Natl*  
475 *Acad Sci U S A.* 101:17404-17409.
- 476 Palty, R., A. Raveh, I. Kaminsky, R. Meller, and E. Reuveny. 2012. SARAF inactivates the store operated  
477 calcium entry machinery to prevent excess calcium refilling. *Cell.* 149:425-438.
- 478 Park, C.Y., P.J. Hoover, F.M. Mullins, P. Bachhawat, E.D. Covington, S. Raunser, T. Walz, K.C. Garcia,  
479 R.E. Dolmetsch, and R.S. Lewis. 2009. STIM1 clusters and activates CRAC channels via direct  
480 binding of a cytosolic domain to Orai1. *Cell.* 136:876-890.
- 481 Pozo-Guisado, E., V. Casas-Rua, P. Tomas-Martin, A.M. Lopez-Guerrero, A. Alvarez-Barrientos, and  
482 F.J. Martin-Romero. 2013. Phosphorylation of STIM1 at ERK1/2 target sites regulates interaction  
483 with the microtubule plus-end binding protein EB1. *J Cell Sci.* 126:3170-3180.
- 484 Prakriya, M., and R.S. Lewis. 2015. Store-Operated Calcium Channels. *Physiological reviews.* 95:1383-  
485 1436.
- 486 Ribeiro, C.M., J. Reece, and J.W. Putney, Jr. 1997. Role of the cytoskeleton in calcium signaling in NIH  
487 3T3 cells. An intact cytoskeleton is required for agonist-induced [Ca<sup>2+</sup>]<sub>i</sub> signaling, but not for  
488 capacitative calcium entry. *J Biol Chem.* 272:26555-26561.
- 489 Rodriguez, O.C., A.W. Schaefer, C.A. Mandato, P. Forscher, W.M. Bement, and C.M. Waterman-Storer.  
490 2003. Conserved microtubule-actin interactions in cell movement and morphogenesis. *Nat Cell*  
491 *Biol.* 5:599-609.

- 492 Sharma, S., A. Quintana, G.M. Findlay, M. Mettlen, B. Baust, M. Jain, R. Nilsson, A. Rao, and P.G.  
493 Hogan. 2013. An siRNA screen for NFAT activation identifies septins as coordinators of store-  
494 operated Ca<sup>2+</sup> entry. *Nature*. 499:238-242.
- 495 Smyth, J.T., A.M. Beg, S. Wu, J.W. Putney, Jr., and N.M. Rusan. 2012. Phosphoregulation of STIM1  
496 leads to exclusion of the endoplasmic reticulum from the mitotic spindle. *Curr Biol*. 22:1487-  
497 1493.
- 498 Smyth, J.T., W.I. DeHaven, G.S. Bird, and J.W. Putney, Jr. 2007. Role of the microtubule cytoskeleton in  
499 the function of the store-operated Ca<sup>2+</sup> channel activator STIM1. *J Cell Sci*. 120:3762-3771.
- 500 Smyth, J.T., W.I. Dehaven, G.S. Bird, and J.W. Putney, Jr. 2008. Ca<sup>2+</sup>-store-dependent and -independent  
501 reversal of Stim1 localization and function. *J Cell Sci*. 121:762-772.
- 502 Srikanth, S., M. Jew, K.D. Kim, M.K. Yee, J. Abramson, and Y. Gwack. 2012. Junctate is a Ca<sup>2+</sup>-sensing  
503 structural component of Orai1 and stromal interaction molecule 1 (STIM1). *Proceedings of the*  
504 *National Academy of Sciences of the United States of America*. 109:8682-8687.
- 505 Srikanth, S., H.J. Jung, K.D. Kim, P. Souda, J. Whitelegge, and Y. Gwack. 2010. A novel EF-hand  
506 protein, CRACR2A, is a cytosolic Ca<sup>2+</sup> sensor that stabilizes CRAC channels in T cells. *Nat Cell*  
507 *Biol*. 12:436-446.
- 508 Trump, B.F., and I.K. Berezsky. 1995. Calcium-mediated cell injury and cell death. *FASEB journal* :  
509 *official publication of the Federation of American Societies for Experimental Biology*. 9:219-228.
- 510 Tsai, F.C., A. Seki, H.W. Yang, A. Hayer, S. Carrasco, S. Malmersjo, and T. Meyer. 2014. A polarized  
511 Ca<sup>2+</sup>, diacylglycerol and STIM1 signalling system regulates directed cell migration. *Nat Cell*  
512 *Biol*. 16:133-144.
- 513 Walsh, C.M., M. Chvanov, L.P. Haynes, O.H. Petersen, A.V. Tepikin, and R.D. Burgoyne. 2010. Role of  
514 phosphoinositides in STIM1 dynamics and store-operated calcium entry. *Biochem J*. 425:159-  
515 168.

- 516 Wu, M.M., E.D. Covington, and R.S. Lewis. 2014. Single-molecule analysis of diffusion and trapping of  
517 STIM1 and Orai1 at endoplasmic reticulum-plasma membrane junctions. *Molecular biology of*  
518 *the cell*. 25:3672-3685.
- 519 Yuan, J.P., W. Zeng, M.R. Dorwart, Y.J. Choi, P.F. Worley, and S. Muallem. 2009. SOAR and the  
520 polybasic STIM1 domains gate and regulate Orai channels. *Nat Cell Biol*. 11:337-343.
- 521 Zhou, Y., P. Srinivasan, S. Razavi, S. Seymour, P. Meraner, A. Gudlur, P.B. Stathopoulos, M. Ikura, A.  
522 Rao, and P.G. Hogan. 2013. Initial activation of STIM1, the regulator of store-operated calcium  
523 entry. *Nature structural & molecular biology*. 20:973-981.

524 **Figure Legends**

525 **Figure 1. iMAPPER-633 Recapitulates Dynamic STIM1 Subcellular Localization.**

526 (A) Diagrams of STIM1 and iMAPPER-633. Amino acid number and domains are indicated. SP, signal  
527 peptide; EF-SAM, EF hand and sterile alpha motif; TM, transmembrane domain; CC1- CC3, coiled coil  
528 domain 1-3; S/P, serine and proline rich region; CT, C-terminal (633-685); FP, fluorescence protein; 2X  
529 FKBP, tandem FKBP domain; FRB, FKBP-rapamycin binding domain. Identical domains between  
530 STIM1 and iMAPPER-633 are in gray. The amino acid sequences of STIM1 CT are displayed. Core EB1  
531 binding motif are labeled in blue. Positively charged residues are labeled in red. Negative charged  
532 residues are labeled in green. (B) A schematic diagram depicting STIM1 and iMAPPER-633 at basal and  
533 oligomerized iMAPPER-633 following AP20187 treatment. Domains are indicated as in (A). (C) YFP-  
534 iMAPPER-633 displays punctate localization following 1  $\mu$ M AP20187 treatment monitored by confocal  
535 microscopy in HeLa cells co-transfected with mCherry-ER. Scale bar, 10  $\mu$ m. (D) Translocation of  
536 mCherry-iMAPPER-633 to ER-PM junctions following 1  $\mu$ M AP20187 treatment monitored by TIRF  
537 microscopy in HeLa cells co-transfected with GFP-MAPPER. Scale bar, 2  $\mu$ m.

538

539 **Figure 2. Inhibition of EB1 Binding Triggers iMAPPER-633 Translocation to ER-PM Junctions.**

540 (A) Translocation of YFP-iMAPPER-633 to ER-PM junctions following 10  $\mu$ M NocZ treatment  
541 monitored by confocal microscopy in HeLa cells co-transfected with EB1-mCherry. Scale bar, 10  $\mu$ m. (B)  
542 Subcellular localizations of YFP-iMAPPER-633 monitored by confocal microscopy in HeLa cells  
543 transfected with siControl or siEB1. Scale bar, 10  $\mu$ m. (C) EB1 protein levels detected by western blotting  
544 using anti-EB1 antibody in HeLa cells transfected with siControl (siCtrl) or siEB1. The intensity of bands  
545 was measured by image J. Relative EB1 levels are indicated. (D) YFP-iMAPPER-633-TRNN distributes  
546 to ER-PM junctions in the absence or presence of AP20187 in HeLa cells monitored by confocal  
547 microscopy. Scale bar, 10  $\mu$ m. (E) Translocation of mCherry-STIM1-TRNN to ER-PM junctions labeled  
548 by YFP-iMAPPER-633-TRNN following 1  $\mu$ M TG treatment in HeLa cells monitored by confocal  
549 microscopy. Scale bar, 10  $\mu$ m. (F) mCherry-STIM1-2K with two PB in tandem in the CT distributes to

550 ER-PM junctions in the absence or presence of 1  $\mu\text{M}$  TG in HeLa cells monitored by confocal  
551 microscopy. Scale bar, 10  $\mu\text{m}$ . (G) Basal cytosolic  $\text{Ca}^{2+}$  levels monitored by Fura-2 ratio in HeLa cells  
552 transfected with mCherry-STIM1, mCherry-STIM1-2K, or mCherry-STIM1-D76A. Mean  $\pm$  SD are  
553 shown (3 independent experiments). n.s., not significant; \*\*\*,  $p < 0.001$ .

554

### 555 Figure 3. **EB1 Binding Constitutes a Diffusion Trap Limiting STIM1 Localization at ER-PM**

556 **Junctions.** (A) Fluorescence recovery of YFP-STIM1 and YFP-STIM1-TRNN after photobleaching (red  
557 square boxes) in HeLa cells monitored by confocal microscopy. Scale bar, 10  $\mu\text{m}$ . (B) Relative intensity  
558 of YFP-STIM1 and YFP-STIM1-TRNN in the bleached areas as described in (A). Mean  $\pm$  SEM are  
559 shown (19 to 20 cells from 3 independent experiments). Mean times to the half recovery ( $t_{1/2}$ ) are  
560 indicated. \*,  $p < 0.05$ . (C and D) Changes in intensity of YFP-STIM1 (C) and YFP-STIM1-TRNN (D) at  
561 ER-PM junctions following 10  $\mu\text{M}$  NocZ treatment monitored by TIRF microscopy in HeLa cells co-  
562 transfected with mCherry-ER. Scale bar, 2  $\mu\text{m}$ . (E) Relative changes in intensity of STIM1 subtypes  
563 normalized to the intensity of mCherry-ER as described in (C and D). Mean  $\pm$  SEM are shown (13 to 14  
564 cells from 3 to 4 independent experiments).

565

### 566 Figure 4. **Activated STIM1 Retains EB1 Binding Ability in ER $\text{Ca}^{2+}$ -depleted Cells.**

567 (A) Localization of YFP-STIM1 and EB1-mCherry in a HeLa cells during the resting state and following  
568 1  $\mu\text{M}$  TG treatment monitored by confocal microscopy. Scale bar, 10  $\mu\text{m}$ . (B) Immunoprecipitation (IP) of  
569 EB1-GFP with mCherry-STIM1 following 1  $\mu\text{M}$  TG treatment in HeLa cells. Protein levels of EB1-GFP  
570 and mCherry-STIM1 in total cell lysates (Input) and in IP were assessed by western blotting using  
571 antibodies against GFP (anti-GFP) and STIM1 (anti-STIM1). (C) Colocalization of YFP-STIM1 and  
572 EB1-mCherry in HeLa cells following 100  $\mu\text{M}$  ML-9 treatment during ER  $\text{Ca}^{2+}$  depletion by 1  $\mu\text{M}$  TG  
573 monitored by confocal microscopy. Scale bar, 10  $\mu\text{m}$ . (D) TG-induced YFP-STIM1 puncta disappear at  
574 ER-PM junctions labeled by mCherry-ER in HeLa cells following 100  $\mu\text{M}$  ML-9 treatment monitored by  
575 TIRF microscopy. Scale bar, 2  $\mu\text{m}$ . (E) Colocalization of YFP-STIM1-D76A and EB1-mCherry in HeLa



576 cells following 100  $\mu$ M ML-9 treatment monitored by confocal microscopy. Scale bar, 10  $\mu$ m. (F) YFP-  
577 STIM1-D76A-TRNN display the ER localization without colocalizing with EB1-mCherry in HeLa cells  
578 following 100  $\mu$ M ML-9 treatment monitored by confocal microscopy. Scale bar, 10  $\mu$ m.

579

580 **Figure 5. EB1 Binding Impedes STIM1 Translocation to ER-PM Junctions and Orail Recruitment**  
581 **during ER Ca<sup>2+</sup> Depletion.**

582 (A) Translocation of YFP-STIM1 and YFP-STIM1-TRNN to ER-PM junctions following 1  $\mu$ M  
583 ionomycin treatment in HeLa cells monitored by TIRF microscopy. Scale bar, 2  $\mu$ m. (B) Relative  
584 translocation to ER-PM junctions of YFP-STIM1 and YFP-STIM1-TRNN as described in (A). Mean  $\pm$   
585 SEM are shown (14 to 15 cells from 3 independent experiments). Mean times to the half-maximal  
586 translocation ( $t_{1/2}$ ) are indicated. \*\*\*,  $p < 0.001$ . (C) Relative translocation to ER-PM junctions of YFP-  
587 STIM1 subtypes and corresponding Orail-mCherry following 1  $\mu$ M TG treatment in HeLa cells  
588 monitored by TIRF microscopy. Black: YFP-STIM1 co-expressed with Orail-mCherry; Red: STIM1-  
589 TRNN co-expressed with Orail-mCherry. Mean traces are shown (15 to 23 cells from 3 to 4 independent  
590 experiments). (D) Times to the half-maximal translocation of YFP-STIM1 subtypes and Orail-mCherry  
591 as described in (C). Mean  $\pm$  SEM are shown. \*\*,  $p < 0.01$ .

592

593 **Figure 6. Disruption of EB1 Binding Facilitated SOCE and Resulted in ER Ca<sup>2+</sup> Store Overload.**

594 (A) Relative changes in cytosolic Ca<sup>2+</sup> concentration following 100  $\mu$ M histamine and 1  $\mu$ M TG  
595 treatment monitored by Fura-2 ratio in HeLa cells transfected with siControl or siEB1. Mean  $\pm$  SEM are  
596 shown (4 independent experiments). (B) SOCE triggered by 100  $\mu$ M histamine and 1  $\mu$ M TG treatment  
597 monitored by Fura-2 ratio in HeLa cells transfected with siControl or siEB1. Mean  $\pm$  SEM are shown (3  
598 independent experiments). Peaks of Fura-2 ratio are indicated. \*,  $p < 0.05$ . (C) SOCE triggered by 100  
599  $\mu$ M histamine and 1  $\mu$ M TG treatment monitored by Fura-2 ratio in HeLa cells transfected with YFP-  
600 STIM1 or YFP-STIM1-TRNN. Mean  $\pm$  SEM are shown (3 independent experiments). Peaks of Fura-2  
601 ratio are indicated. \*,  $p < 0.05$ . (D) Relative changes in cytosolic Ca<sup>2+</sup> concentration in response to

602 depletion and re-addition of extracellular  $\text{Ca}^{2+}$  monitored by Fura-2 ratio in HeLa cells transfected with  
603 YFP-TM, YFP-STIM1-D76A, or YFP-STIM1-D76A-TRNN. Mean  $\pm$  SEM are shown (3 to 4  
604 independent experiments). (E) Peak ER  $\text{Ca}^{2+}$  release by 1  $\mu\text{M}$  ionomycin treatment in the absence of  
605 extracellular  $\text{Ca}^{2+}$  monitored by Fura-2 ratio in HeLa cells transfected with siControl or siEB1. Mean  $\pm$   
606 SEM are shown (3 independent experiments). \*\*,  $p < 0.01$ . (F) Relative ER  $\text{Ca}^{2+}$  levels in the resting state  
607 (phase I), following 5  $\mu\text{M}$  BHQ treatment (phase II), and after BHQ washout (phase III and IV)  
608 monitored by D1ER in HeLa cells transfected with mCherry-STIM1 or mCherry-STIM1-TRNN. Mean  $\pm$   
609 SEM are shown (16 to 26 cells from 3 independent experiments). \*,  $p < 0.05$  between STIM1 and  
610 STIM1-TRNN. (G) Relative ER  $\text{Ca}^{2+}$  levels in phase I and IV as described in (F) monitored by D1ER in  
611 HeLa cells transfected with mCherry-STIM1 or mCherry-STIM1-TRNN. Mean  $\pm$  SEM are shown. n.s.,  
612 not significant; \*,  $p < 0.05$ .

613

614 **Figure 7. Model of STIM1-EB1 Interaction Regulates STIM1 Translocation to ER-PM Junctions.**

615 **Supplemental Figure Legends**

616 **Figure S1. Localization of 2X FKBP-TM and iMAPPER-633.**

617 (A) A diagram of 2X FKBP-TM construct (left) and its ER localization as shown by confocal microscopy  
618 in HeLa cells. Scale bar, 10  $\mu\text{m}$ . (B) The localization of YFP-iMAPPER-633 in HeLa cells coexpressing  
619 mCherry-STIM1 monitored by confocal microscopy. Yellow arrowheads indicate iMAPPER-633 puncta  
620 without STIM1 colocalization, possibly formed due to loss of EB1 binding after MT catastrophe. Scale  
621 bar, 10  $\mu\text{m}$ .

622

623 **Figure S2. Minimal Interaction between STIM1-TRNN with EB1 and STIM1-Orai1 Complexes**  
624 **Localized at ER-PM Junctions following ML-9 Treatment.**

625 (A) Immunoprecipitation (IP) of EB1-GFP with mCherry-STIM1-TRNN following 1  $\mu\text{M}$  TG treatment in  
626 HeLa cells. Protein levels of EB1-GFP and mCherry-STIM1-TRNN in total cell lysates (Input) and in IP  
627 were assessed by western blotting using antibodies against GFP (anti-GFP) and STIM1 (anti-STIM1). (B)  
628 YFP-STIM1 and Orai1-mCherry puncta remain unchanged following 100  $\mu\text{M}$  ML-9 treatment monitored  
629 by TIRF microscopy. Scale bar, 2  $\mu\text{m}$ .

630

631 **Figure S3. EB1 Binding Impedes STIM1 Translocation to ER-PM Junctions during ER  $\text{Ca}^{2+}$**   
632 **Depletion.**

633 (A) Translocation of YFP-STIM1 and YFP-STIM1-TRNN to ER-PM junctions following 1  $\mu\text{M}$  TG  
634 treatment in HeLa cells monitored by TIRF microscopy. Scale bar, 2  $\mu\text{m}$ . (B) Relative translocation to  
635 ER-PM junctions of YFP-STIM1 and YFP-STIM1-TRNN as described in (A). Mean  $\pm$  SEM are shown  
636 (19 to 22 cells from 4 independent experiments). Mean times to the half-maximal translocation ( $t_{1/2}$ ) are  
637 indicated. \*,  $p < 0.05$ . (C) Translocation of YFP-STIM1 to ER-PM junctions following 1  $\mu\text{M}$  ionomycin  
638 treatment in HeLa cells transfected with siControl or siEB1 monitored by TIRF microscopy. Scale bar, 2  
639  $\mu\text{m}$ . (D) Relative translocation to ER-PM junctions of YFP-STIM1 as described in (C). Mean  $\pm$  SEM are  
640 shown (9 to 10 cells from 3 independent experiments).  $t_{1/2}$  are indicated. \*,  $p < 0.05$ .

641 **Supplemental Movie 1. iMAPPER-633 Binds to EB1 at MT Plus-ends.** iMAPPER-633 displayed  
642 comet-like structures moving toward the cell periphery monitored by confocal microscopy in HeLa cells  
643 transfected with YFP-iMAPPER-633. Scale bar, 10  $\mu\text{m}$ .

644

645 **Supplemental Movie 2. Activated STIM1 Retains EB1 Binding Ability.** Activated form YFP-STIM1-  
646 D76A (green) trapped by EB1-mCherry (red) following 100  $\mu\text{M}$  ML-9 treatment in HeLa cells monitored  
647 by confocal microscopy. Scale bar, 10  $\mu\text{m}$ .

**Table S1. Oligonucleotides used in this study.**

| Name             | Sequence (5' - 3')                                                                                    |
|------------------|-------------------------------------------------------------------------------------------------------|
| 2X FKBP F        | atcgactagtggagcaggtgctctcgag (SpeI)                                                                   |
| 2X FKBP R        | atcgaagctttgcactgcctccagctga (HindIII)                                                                |
| MAPPER TM F      | atcgaagcttctggatacagtgtctttgg (HindIII)                                                               |
| MAPPER cytosol R | atcgcaattgccattagaattgctctagcagc (MfeI)                                                               |
| STIM1 633 F      | ctaggaattccagccgagccctgcaagccag (EcoRI)                                                               |
| CR               | cctctacaaatgtggtatgg (BamHI)                                                                          |
| CT-TRNN F        | gccgaaacacacgcaataaccacctggctggcaagaaggc                                                              |
| CT-TRNN R        | gccagccaggtggttattgcgtgttttcggctggcttg                                                                |
| STIM1-2K F       | cggagaagtttctctcaaaatcttaagaagcctcttaagaagggggcggggcggaagaagtttctctcaaa<br>atcttaagaagcctcttaagaagtag |
| STIM1-2K R       | ctacttctaagaggcttctaaagattttgagaggaaacttctccgccccgcccccttctaagaggcttctaaag<br>atcttgagaggaaacttctccg  |
| EB1 F            | ggactcagatctcgagatggcagtgaaactataactcaa (XhoI)                                                        |
| EB1 R            | ggcgaccggtggatccgaatactcttcttctcctctg (BamHI)                                                         |
| siEB1 F          | gcgtaatacgactcactatagggcagtagatccagaactcaaaa                                                          |
| siEB1 R          | gcgtaatacgactcactataggtcttcttctcctcctgtgg                                                             |

**A**

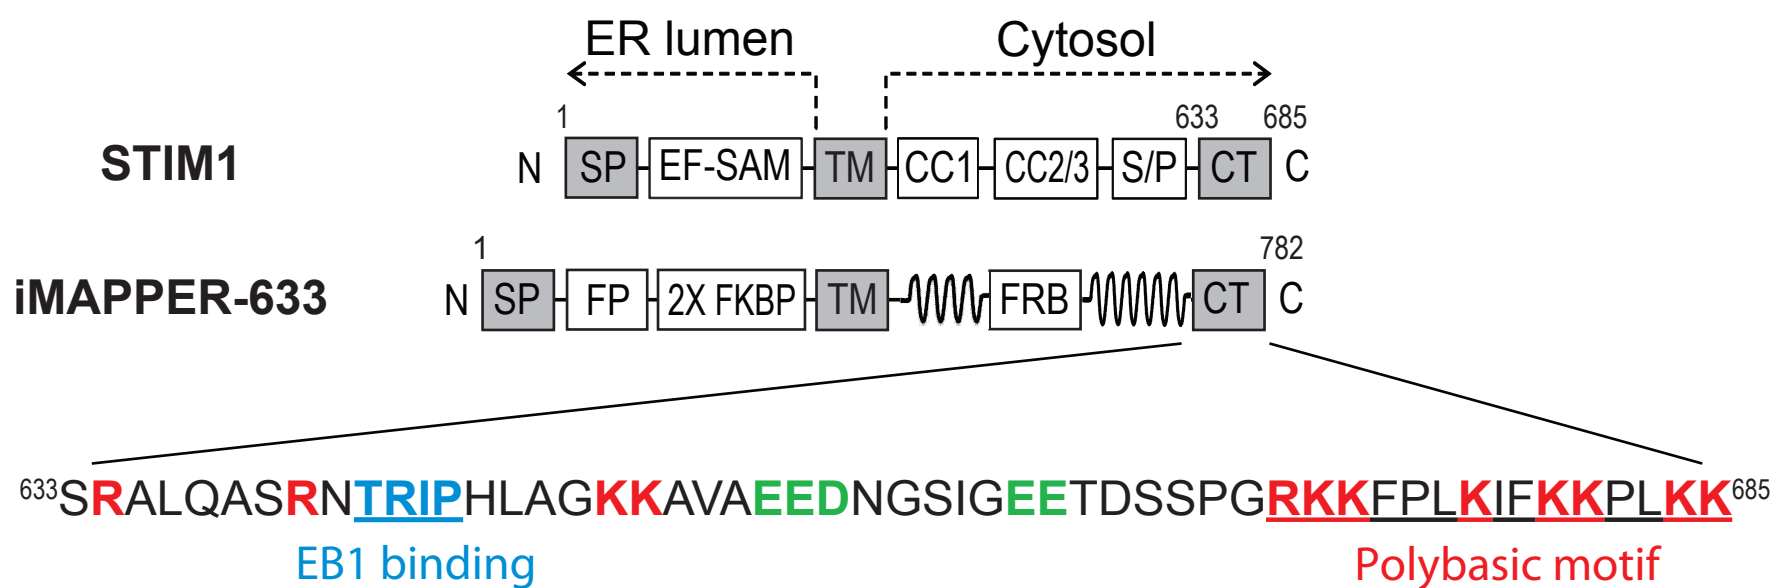

**B**

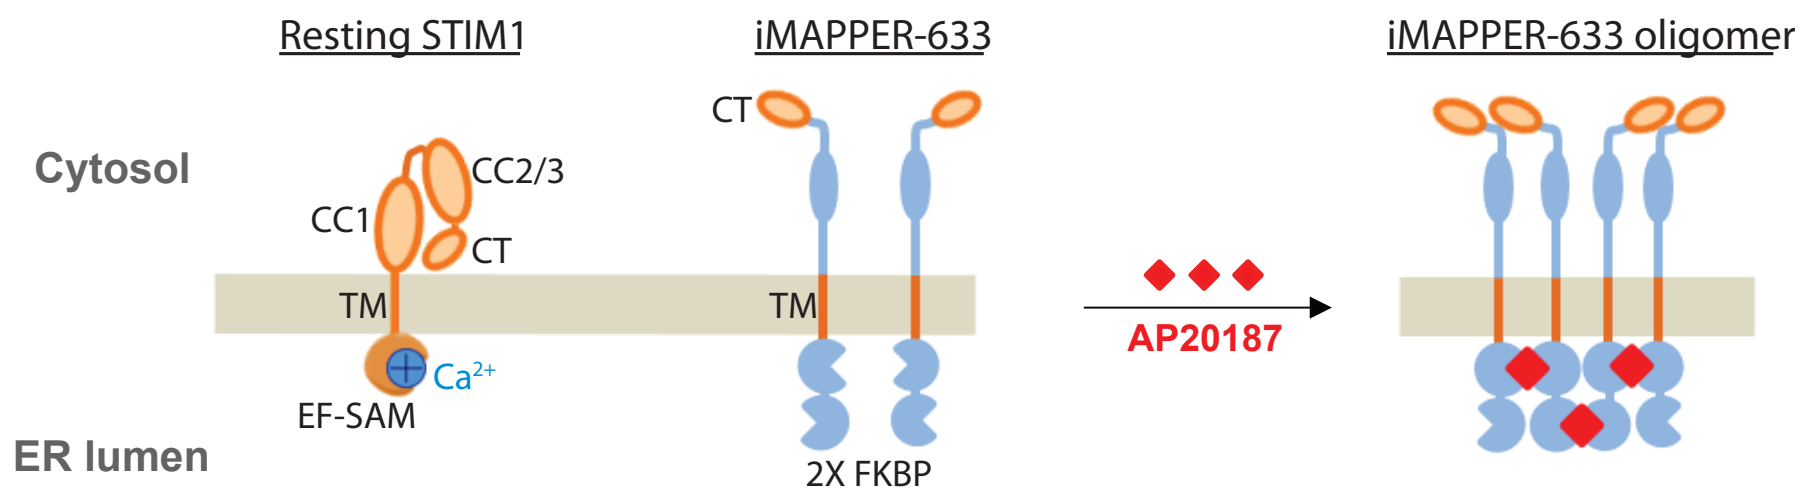

**C**

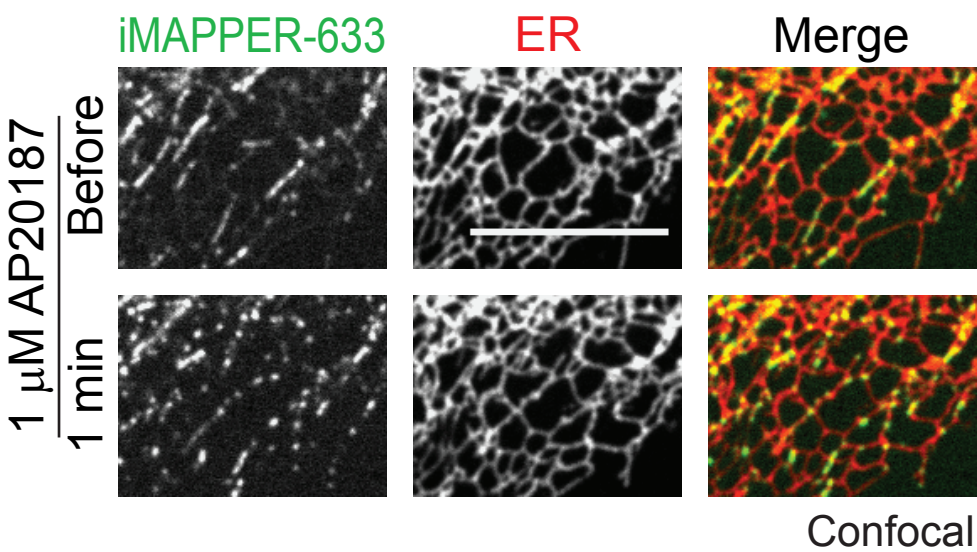

**D**

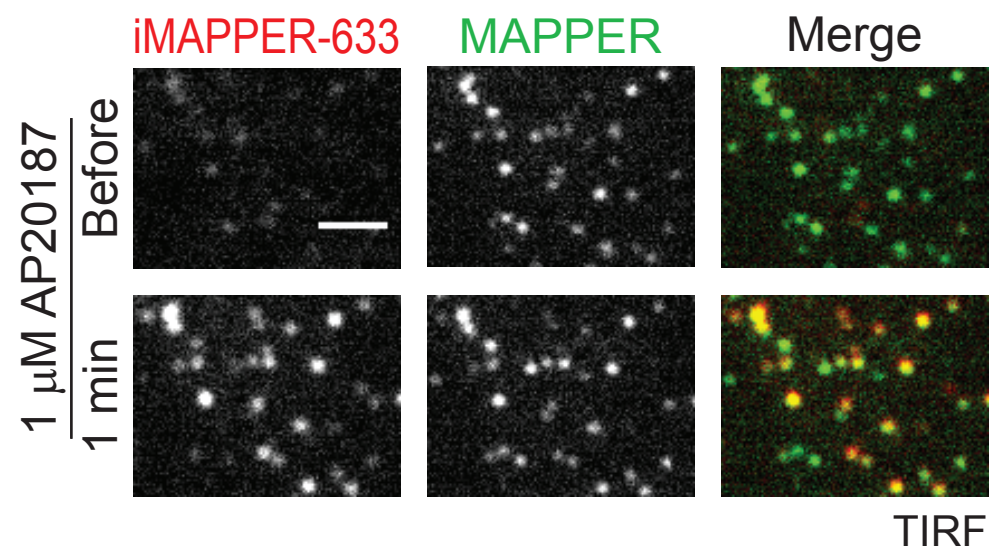



# Figure 2.

bioRxiv preprint doi: <https://doi.org/10.1101/224162>; this version posted November 22, 2017. The copyright holder for this preprint (which was not certified by peer review) is the author/funder, who has granted bioRxiv a license to display the preprint in perpetuity. It is made available under aCC-BY 4.0 International license.

## A

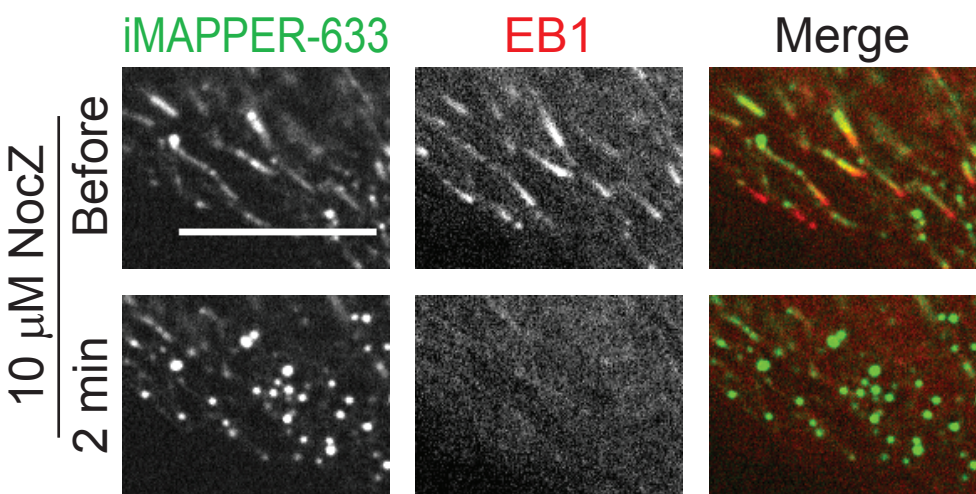

## B

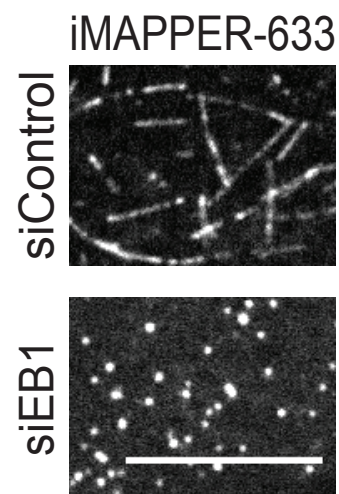

## C

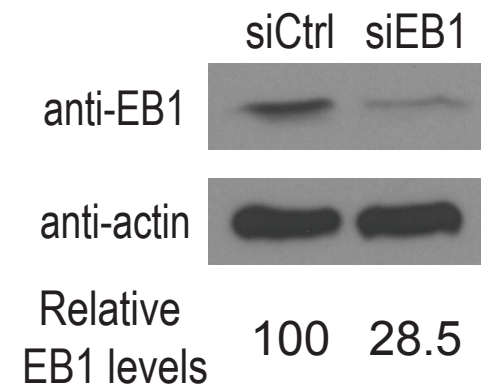

## D

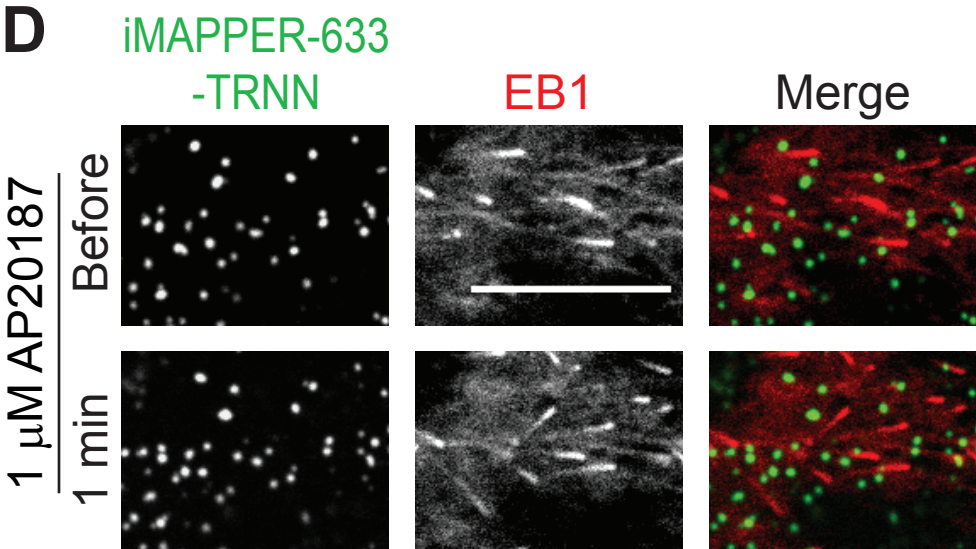

## E

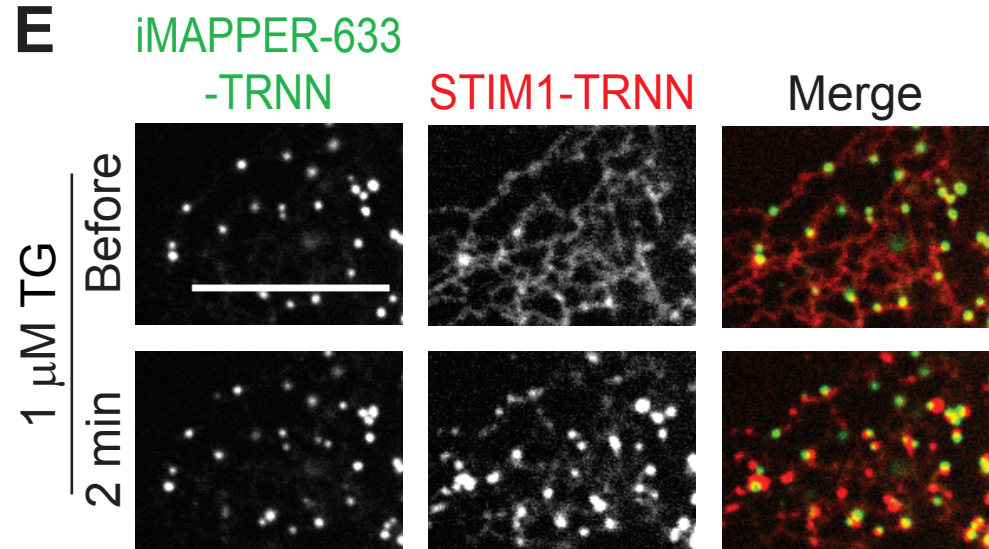

## F

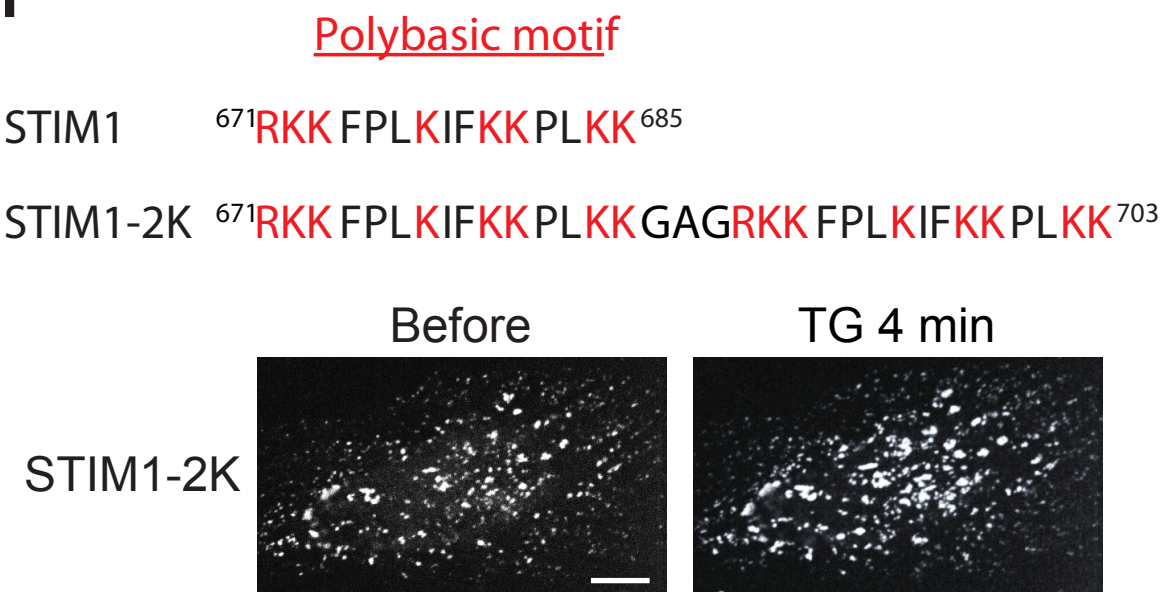

## G

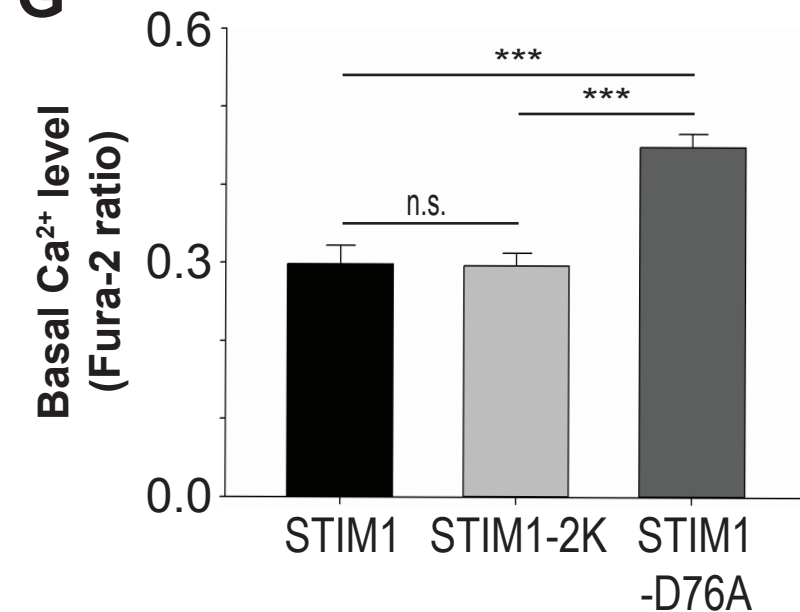



**Figure 3.****A**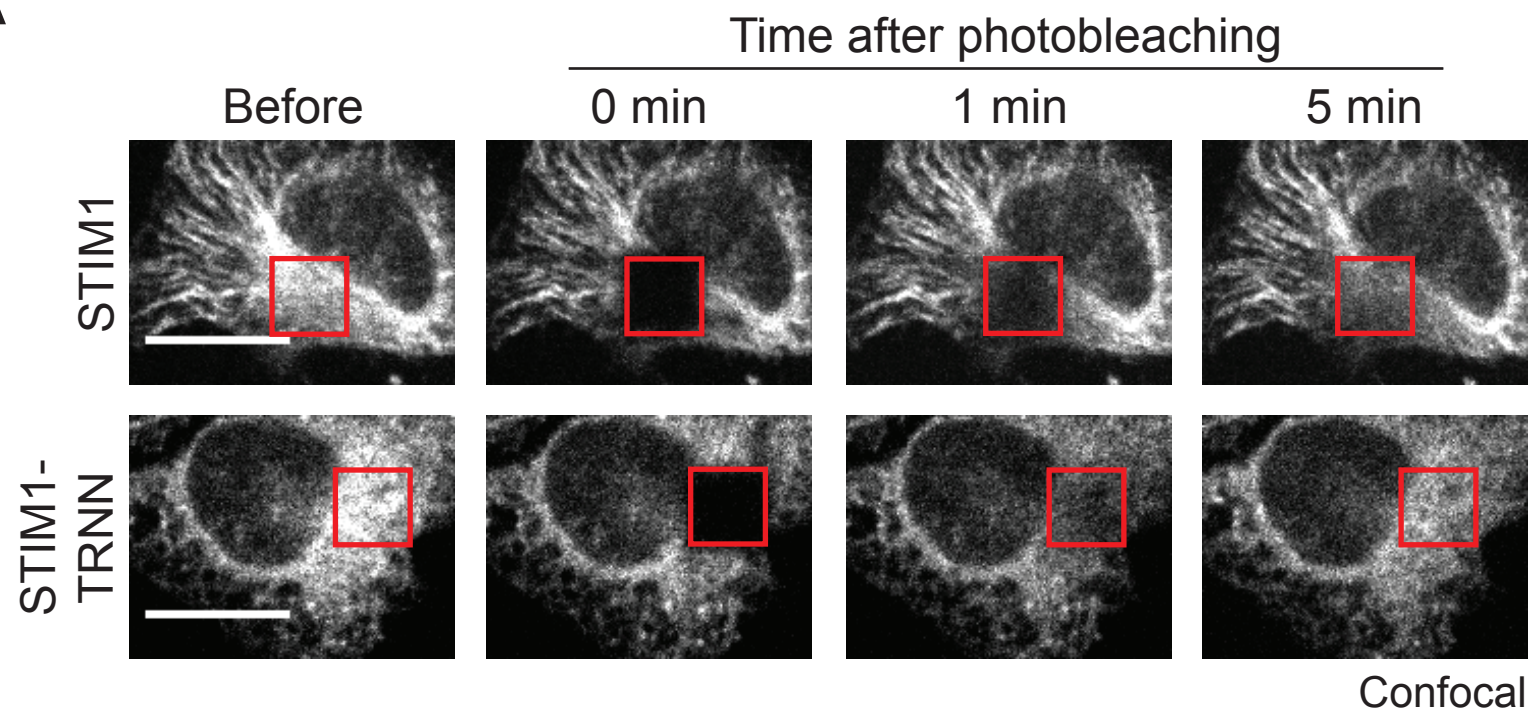**B**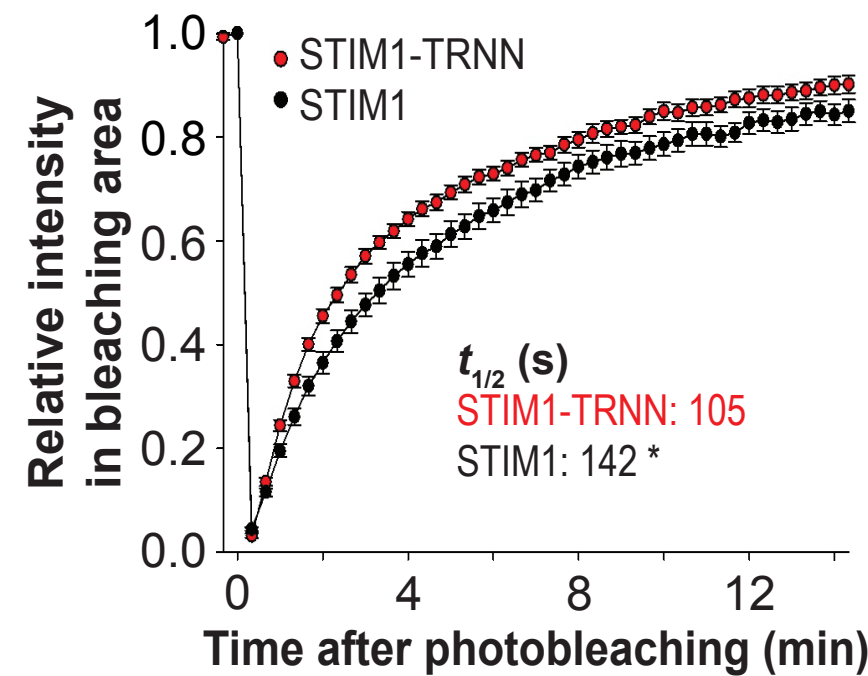**C**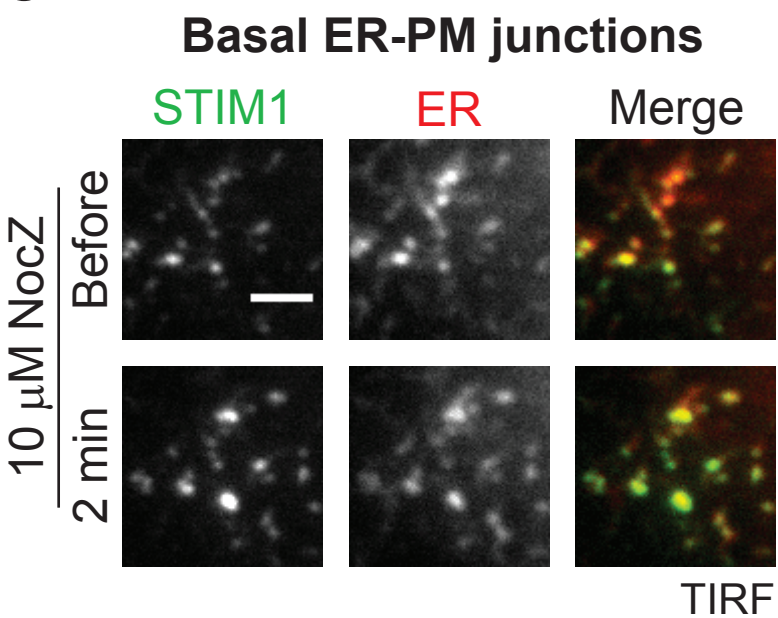**D**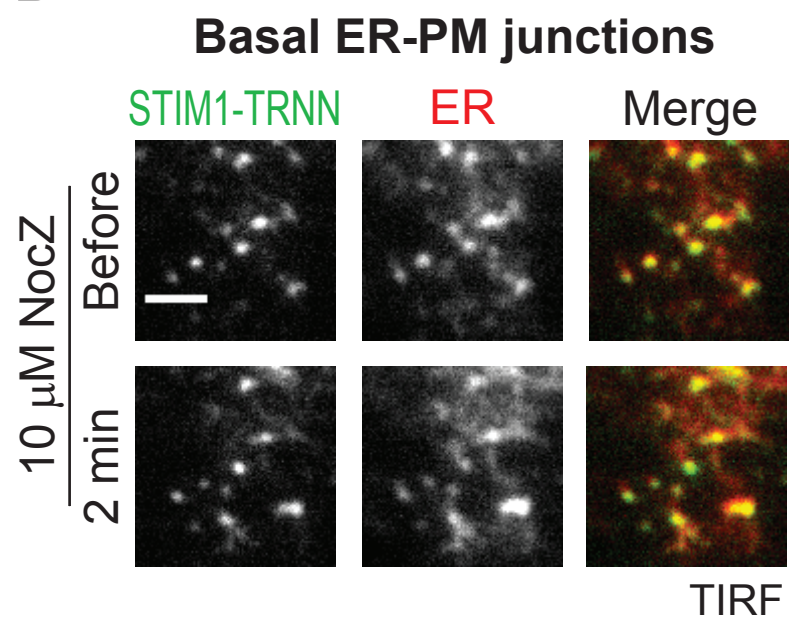**E**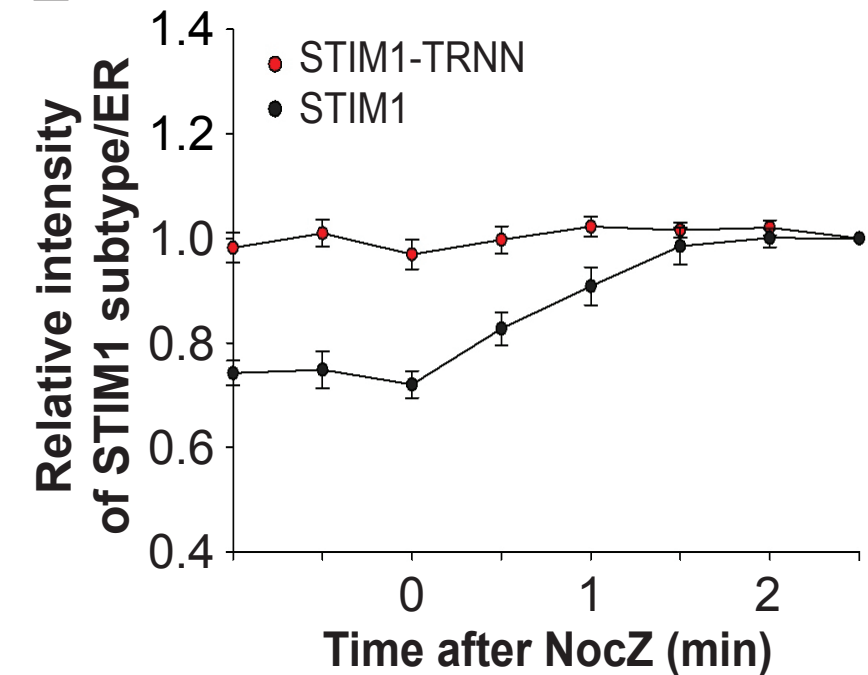



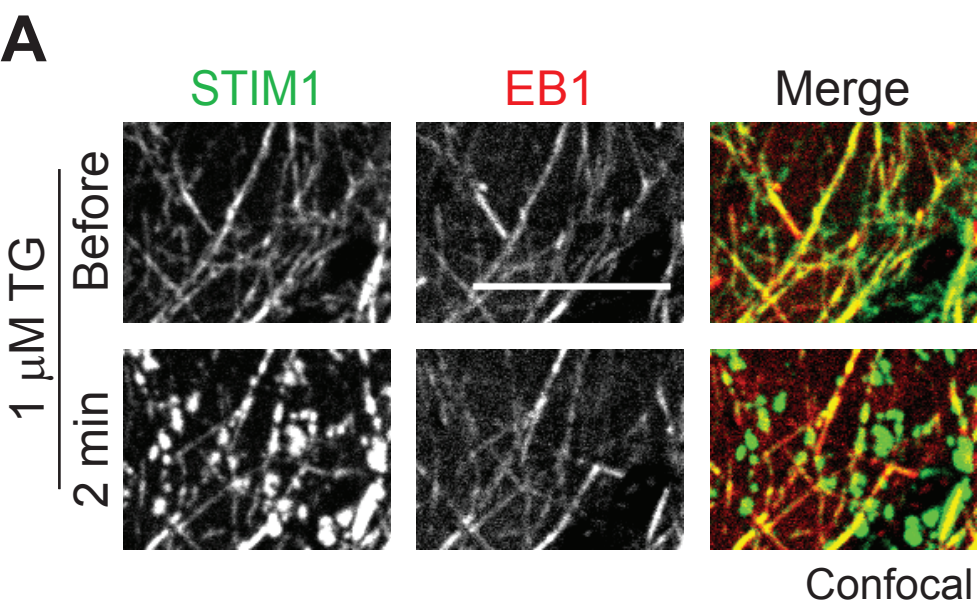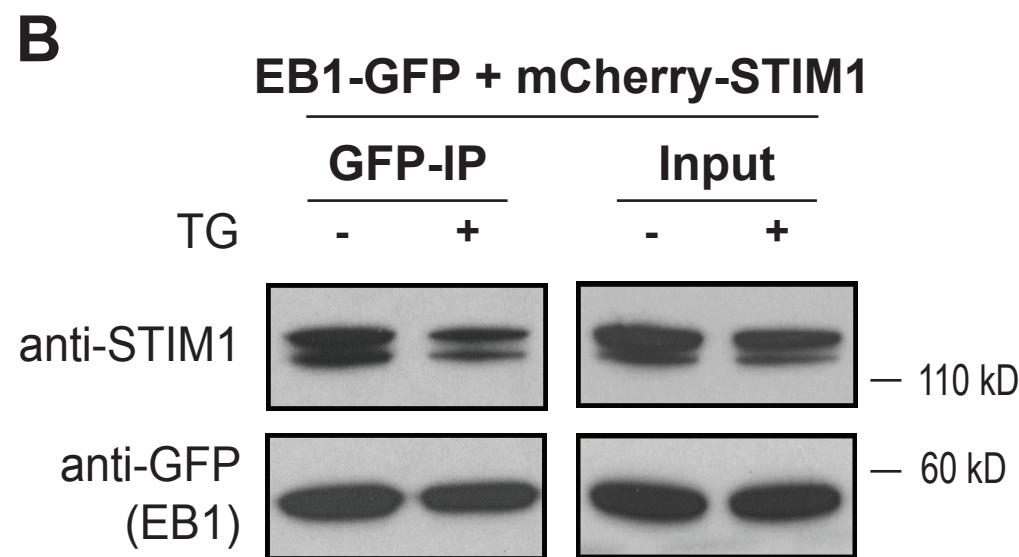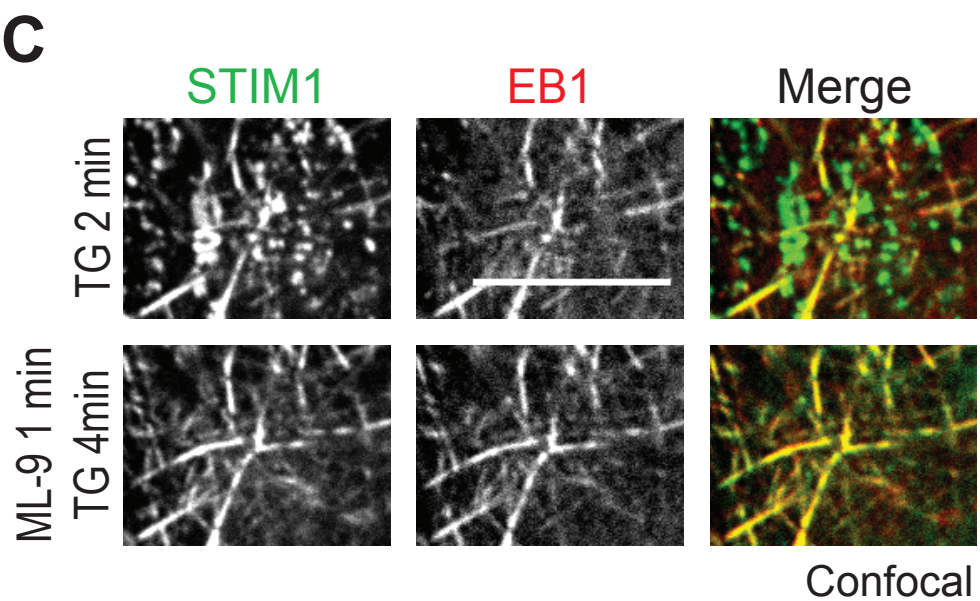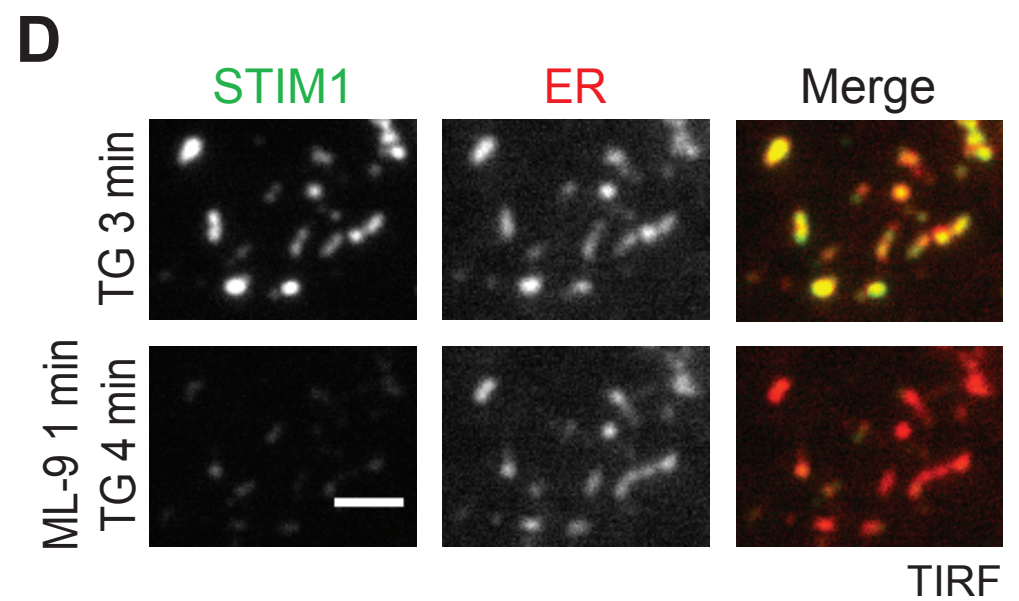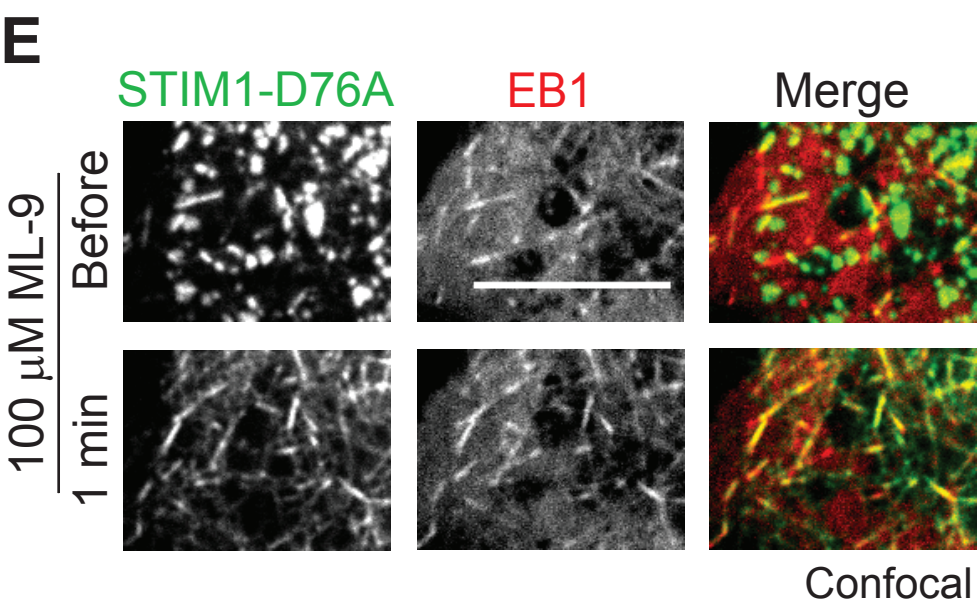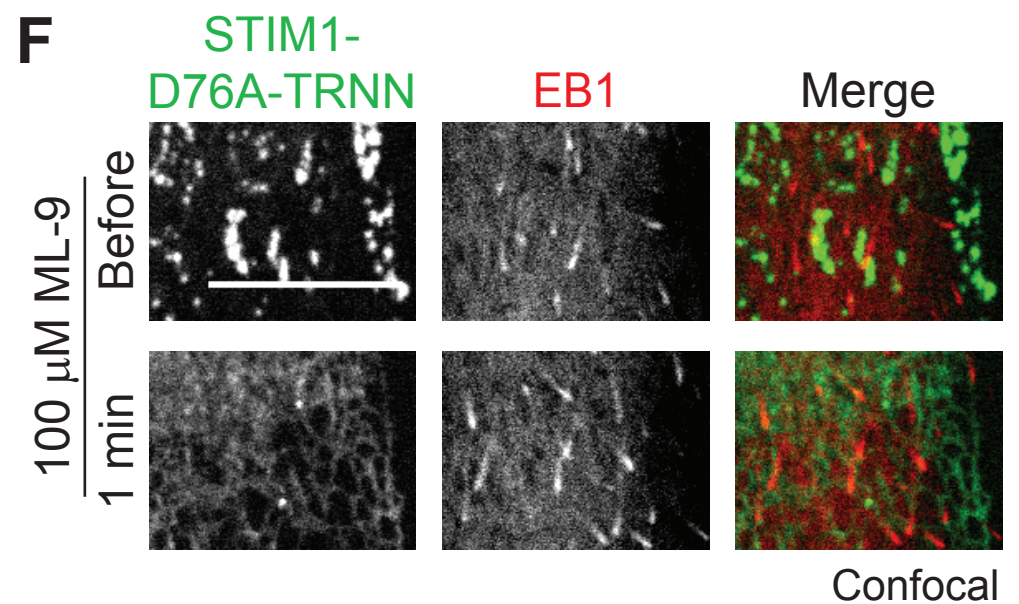

**Figure 5.****A**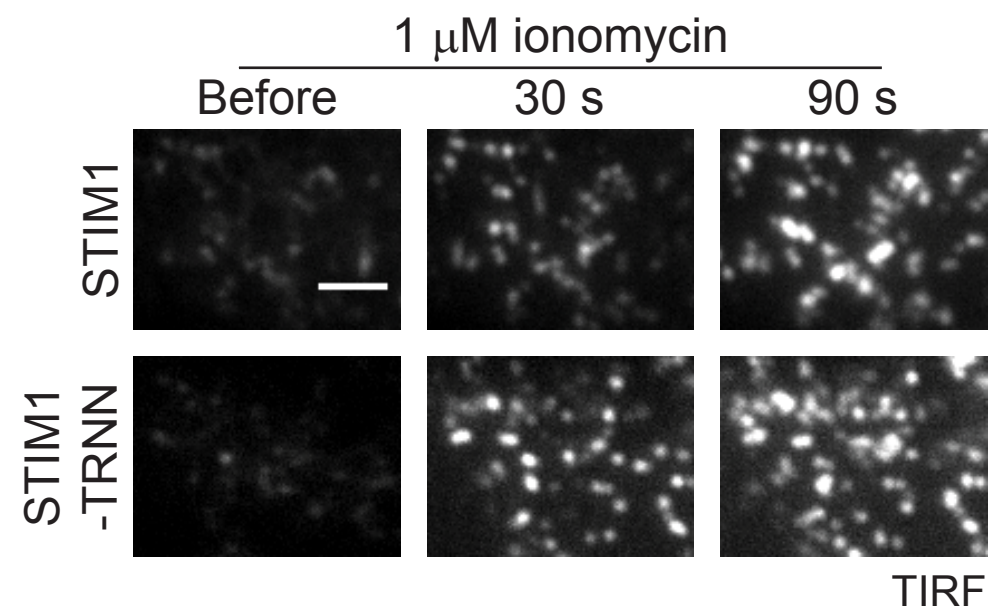**B**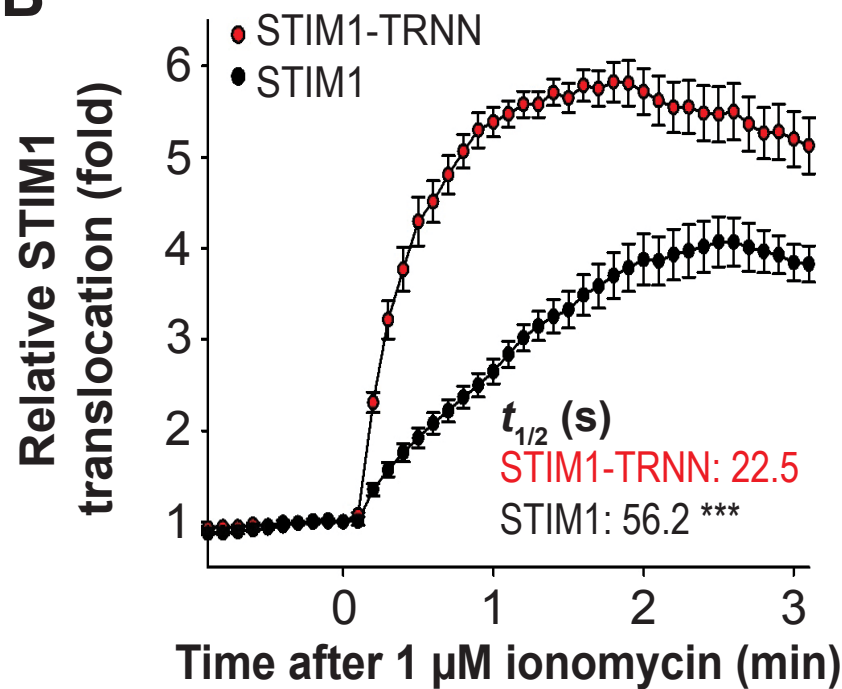**C**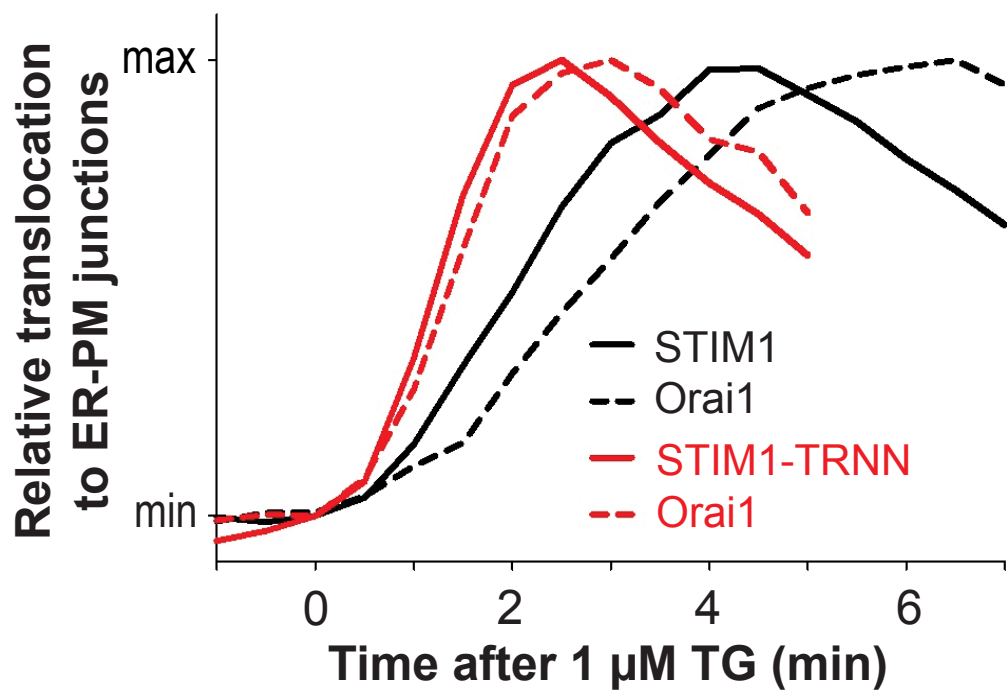**D**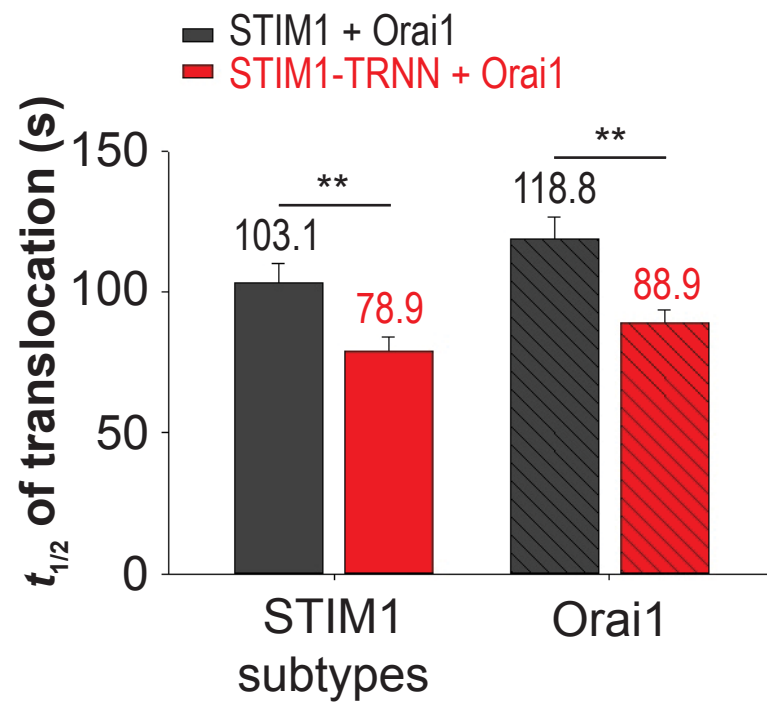



Figure 6.

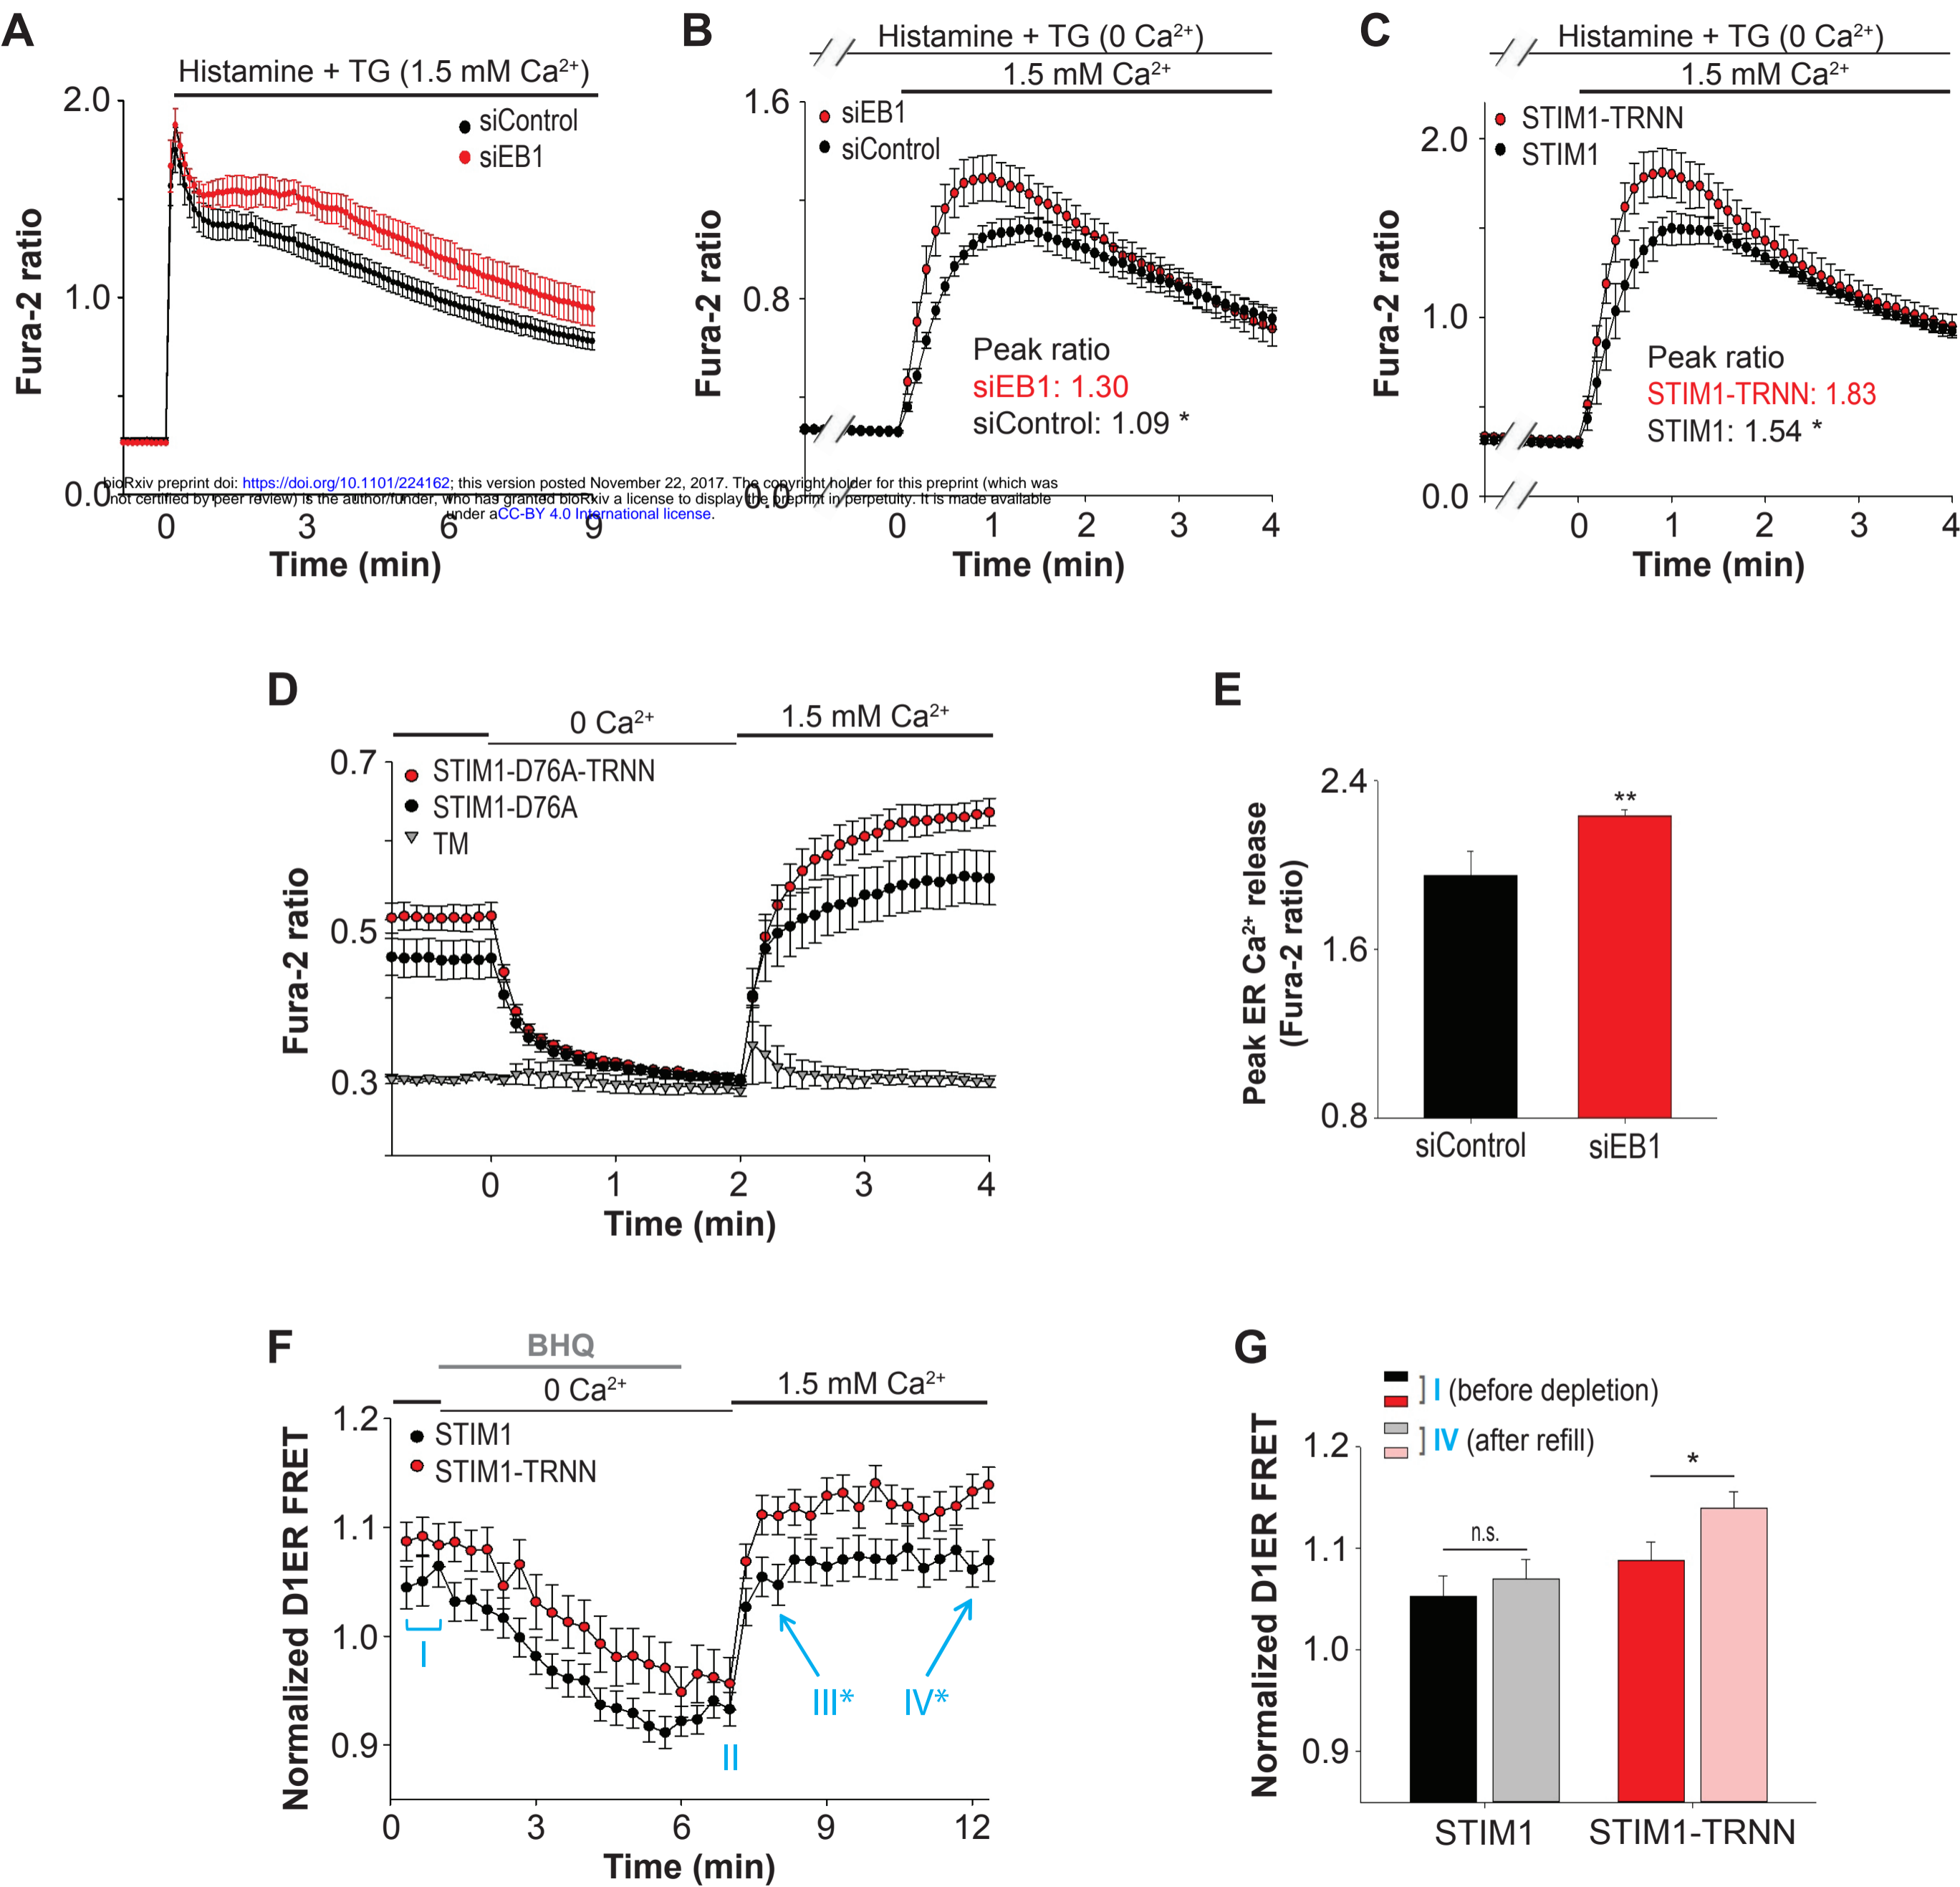

Figure 7.

Resting state

Store depletion

Regions with growing MT

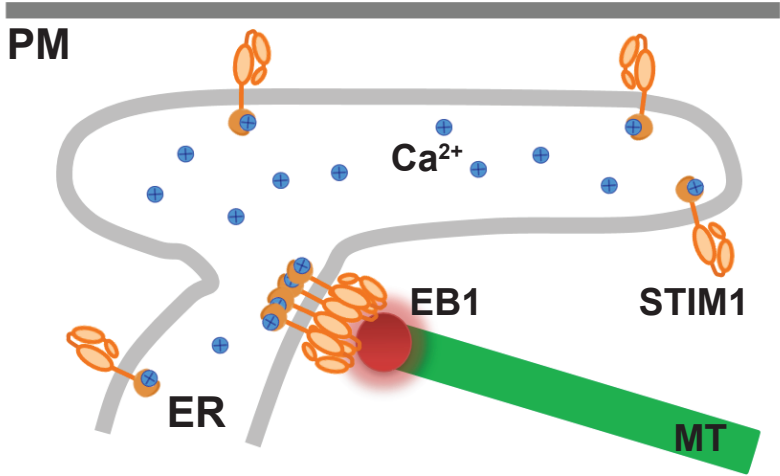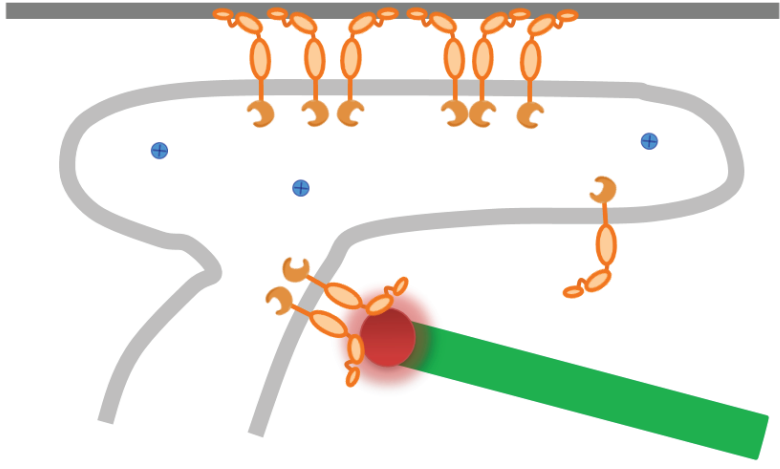

Regions w/o growing MT

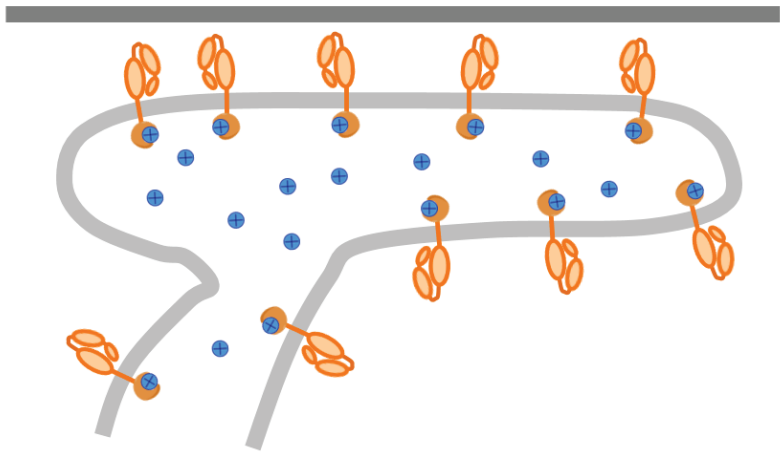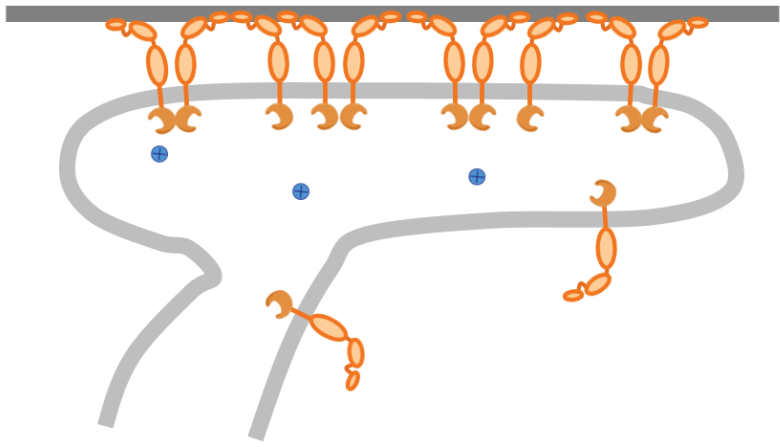

**Figure S1.**

**A**

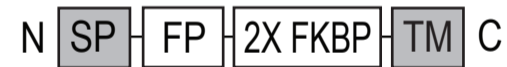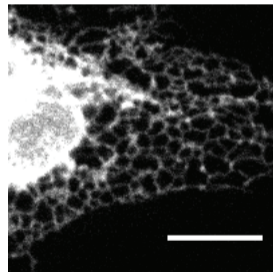

**B**

iMAPPER-633

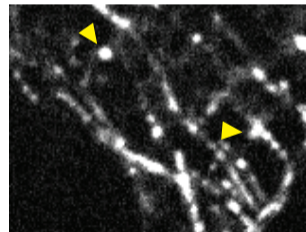

STIM1

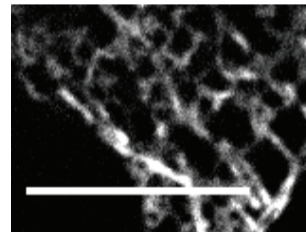

Merge

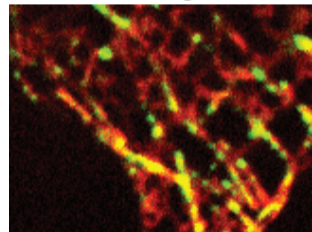

**Figure S2.**

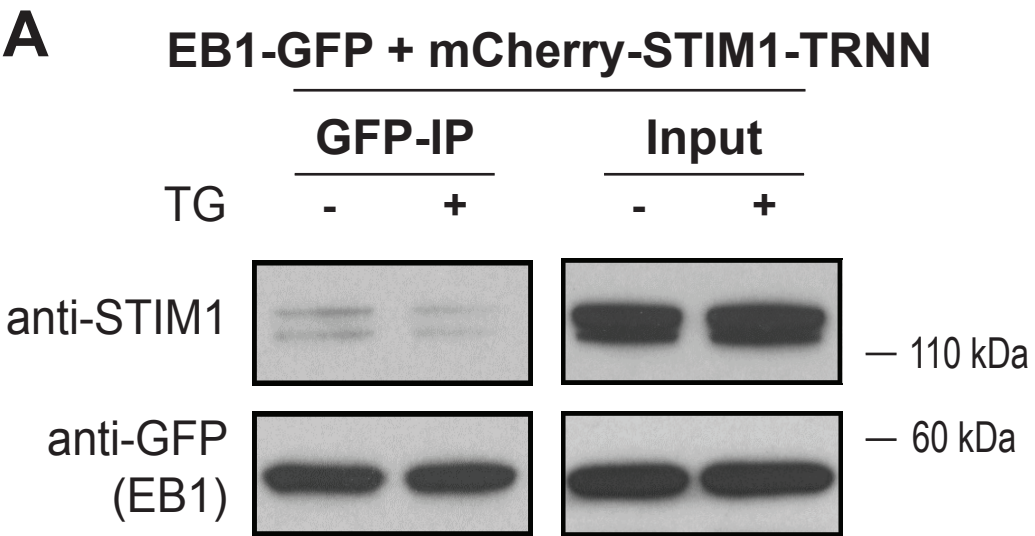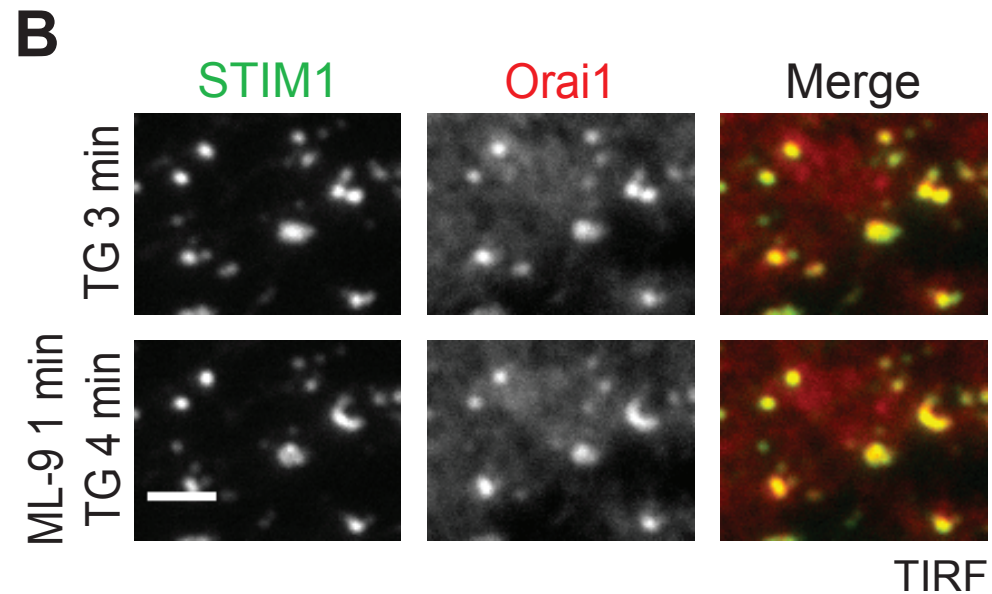

Figure S3.

**A**

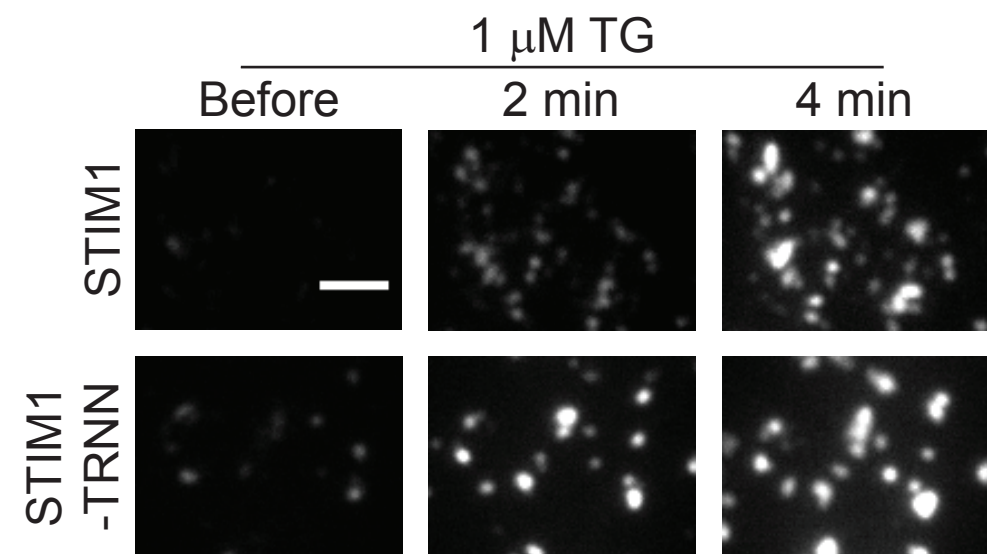

**B**

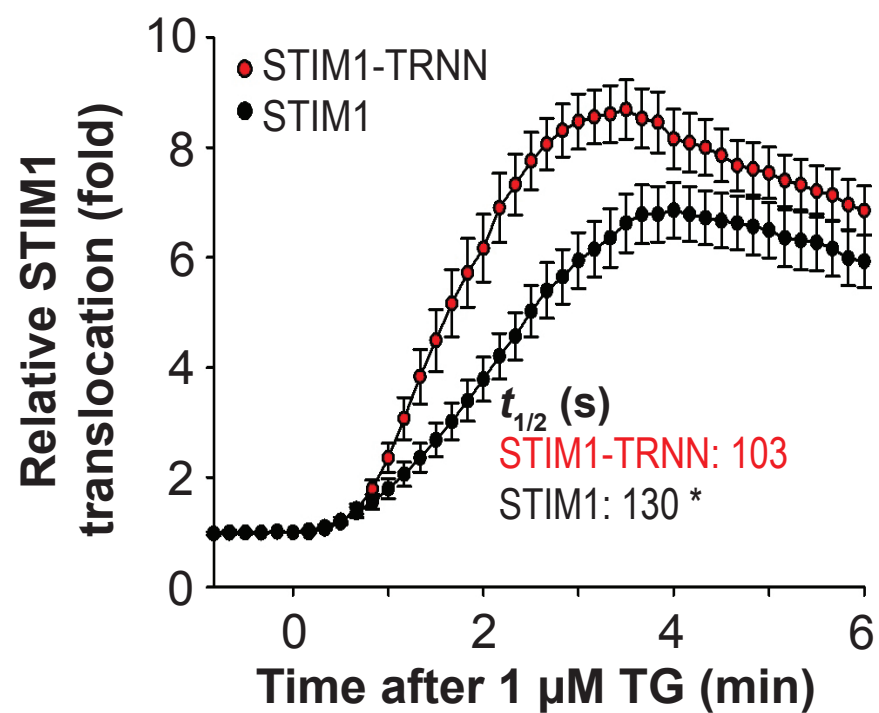

**C**

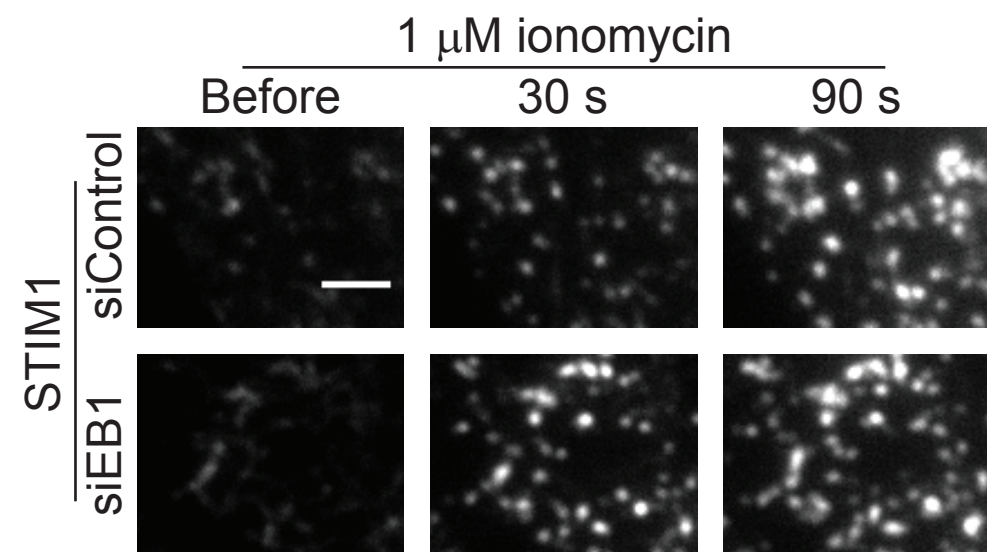

**D**

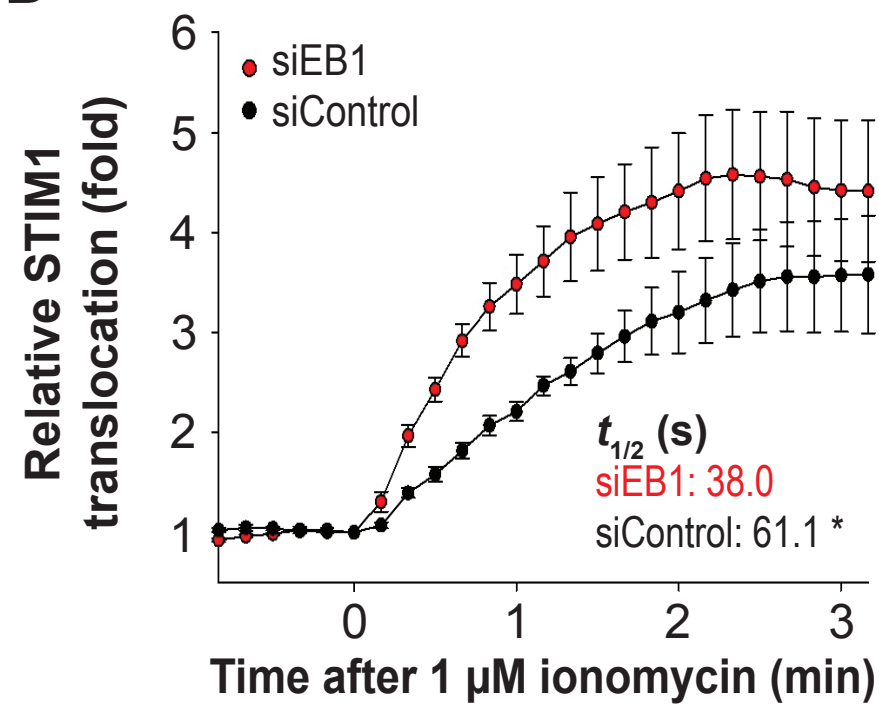

Source: http://biorxiv.org/content/10.1101/224162v1.full.pdf
